# Supplementary material for: Transcriptomic Features of T Cell-Barren Tumors Are Conserved Across Diverse Tumor Types
Source: Front Immunol. 2020 Feb 13;11:57. doi: 10.3389/fimmu.2020.00057 (PMC7031496; doi:10.3389/fimmu.2020.00057)
Supplement: Supplementary Datasheet 1 — A series of tables detailing genetic data. [file Data_Sheet_1.xlsx]

## Sheet: Tsig_LFC perc rank
Genes associated with T cell-cold tumors by Tsig-LFC method.
The Tsig (T cell identity) signature was used to stratify tumors into tertiles. In each tumor data set, genes were ranked by log-fold change (LFC) and assigned to percentile ranks (higher rank = greater overexpression in Tsig-low tertile)
Shown are the percentile ranks (in each data set) for the genes identified in the top percentile (>99.0) of at least 5 data sets (column Y).
Symbol	BLCA	BRCA	CESC	COADREAD	ESCA	GBM	HNSC	KIRC	KIRP	LGG	LIHC	LUAD	LUSC	OV	PAAD	PCPG	PRAD	SARC	SKCM	STAD	TGCT	THCA	UCEC	# times in top perc rank out of 23
RCOR2	97.27	80.55	99.78	24.56	99.06	99.54	99.3	95.67	95.13	99.81	10.66	99.27	99.12	99.41	99.32	47.76	15.52	99.8	99.87	99.8	88.47	93.23	97.29	12
FREM2	99.5	91.49	99.71	99.96	99.98	99.9	99.05	95	98.08	12	18.86	99.49	98.8	99.36	16.86	92.7	5.86	95.79	99.77	98.89	96.22	97.76	99.75	10
CASKIN1	99.61	99.45	98.95	24.72	97.14	99.45	99.4	94.27	98.25	98.34	91.9	99.95	98.96	91.12	91.89	75.05	99.93	99.47	99.98	98.78	86.87	99.23	98.54	9
TOX3	99.99	99.4	99.96	98.08	5.35	98.59	56.76	98.97	99.44	99.69	95.26	99.1	13.11	99.7	93.18	99.24	89.19	97.66	97.55	84.91	99.68	23.85	4.03	9
SLC6A10P	99.11	70.41	97.27	40.44	94.65	88.6	99.43	68.03	95	92.89	29.38	95.64	99.62	99	99.63	30.23	96.02	99.67	96.01	99.05	90.63	34.49	99.85	8
BMP7	99.48	10.52	66.48	99.24	99.63	97.6	94.97	94.52	95.9	84.7	14.94	9.18	99.6	99.62	31.55	52.81	6.33	87.96	94.41	99.9	98.65	96.27	99.08	7
DUSP9	94.62	8.76	78.58	25.91	99.13	97.3	99.91	81.62	96.61	99.8	7.8	71.98	99.41	93.75	95.99	82.26	47.01	99.6	99.55	99.1	96.83	17.25	98.68	7
EEF1A2	99.94	99.98	98.29	19.47	98.6	89.24	99.2	25.6	96.83	34.27	99.11	99.95	72	47.84	93.98	88.31	85.81	99.85	96.48	99.43	96.49	91.13	89.9	7
KIF1A	97.41	12.05	97.84	10.23	92.28	98.12	87.24	96.44	59.35	86.72	87.81	99.13	25.91	99.66	13.19	62.06	97.25	99.91	99.62	76.1	99.09	99.93	99.36	7
PPARGC1A	25.37	12.79	52.14	90.82	26.75	73.31	18.05	99.94	99.09	30.33	99.38	99.59	19.91	89.47	34.56	88.27	8.24	79.4	97.47	99.72	96.67	99.83	99.43	7
RAP1GAP	99.49	95.57	99.79	48.47	95.19	98.87	99.18	99.26	97.25	88.77	36.44	99.85	93.18	92.4	92.02	17.49	98.23	98.29	63.86	99.29	85.15	99.53	92.74	7
SLC15A1	99.4	6.25	99.27	99.33	99	25.54	98.86	3.67	13.41	26.63	17.63	99.62	96.49	24.24	17.33	43.63	18.65	82.84	93.93	99.77	99.17	33.88	57.5	7
SOX11	45.89	23.09	98.94	45.19	96.97	99.72	98.75	92.18	29.91	96.43	51.26	99.93	81.74	99.2	98.49	89.34	40.46	99.21	99.39	93.28	99.96	10.71	99.86	7
AKR1C2	99.7	7.03	99.95	93.23	100	4.15	99.98	79.34	73.42	29.32	81.08	99.92	99.75	40.83	9.92	36.78	10.48	5.55	58.36	90.83	61.01	92.76	93.7	6
AKR1C3	99.11	18.81	99.9	98.64	99.66	4.6	99.85	13.04	25.23	90.79	33.56	99.37	99.12	71.16	28.17	6.96	14.02	8.35	19.03	78.48	20.99	94.38	49.05	6
ATP2C2	99	92.67	99.85	94.7	92.89	72.88	99.4	52.79	91.29	78.69	9.89	99.7	90.14	92.32	94.38	64.3	24.71	57.81	86.43	99.19	95.28	99.07	68.22	6
B4GALNT4	97.61	86.07	97.43	22.45	99.8	96.7	99.38	21.84	40.14	91.33	7.58	99.43	99.14	97.63	21.42	98.08	84.21	99.95	99	54.75	97.18	12.09	95.73	6
CA12	97.34	99.82	99.63	69.25	98.24	95.59	99.16	64.61	99.85	32.18	14.77	57.07	99.18	10.41	89.99	3	40.56	95.04	16.11	90.89	92.39	99.65	31.13	6
CECR2	99.46	80.57	22.89	67.06	91.9	99.64	28.07	97.87	83.31	98.57	95.06	99.9	97.05	98.87	10.3	99.76	99.86	94.18	99.74	23.16	39.76	93.83	91.67	6
CHP2	99.91	28.8	99.94	99.32	99.81	28.06	99.74	45.83	68.32	71.54	79.4	18.46	99.22	87.62	13.87	30.39	1.29	49.55	70.08	94.66	97.84	62.17	98.52	6
COL2A1	47.43	99.78	99.4	91.73	85.68	82.4	99.35	51.2	74.69	15.77	42.62	98.53	86.56	99.99	92.48	69.93	17.2	99.97	97.5	73.75	99.76	38.25	54.37	6
COL9A3	93.05	10.36	26.48	99.6	95.46	99.91	96.58	55.3	87.41	4.93	73.01	65.51	19.24	99.5	78.2	89.96	14	98.16	97.4	99.68	91.75	99.78	99.74	6
CREG2	90.93	92.95	99.11	13.93	98.6	86.13	99.24	99.81	86.2	19.43	70.91	66	99.13	38.22	99.85	14.53	58.98	44.64	89.91	99.64	71.87	37.36	67.49	6
DLX2	34.4	96.98	99.44	86.1	99.8	14.03	99.87	18.63	51.9	10.65	19.26	89.53	99.54	40.46	48.89	28.4	99.35	98.44	99.73	91.31	93.74	11.69	87.29	6
FSTL4	99.82	98.48	13.35	98.75	99.68	85.34	76.83	98.99	11.51	76.82	15.92	99.28	92.55	99.35	81.98	78.84	64.7	99.34	32.07	99.24	73.23	9.71	69.97	6
LPPR1	99.01	10.86	99.24	98.93	97.51	80.24	98.95	99.86	98.79	99.14	97.21	99.38	94.57	92.9	35.46	16.12	97.31	97.7	91.12	99.25	91.98	6.1	51.11	6
MAGEA6	76.96	11.23	36.21	33.68	99.9	70.73	99.99	38.72	24.28	78.58	9.82	99.15	99.85	10.88	86.31	18.21	71.79	87.16	35.76	99.96	8.65	60.61	99.28	6
MAGEA9B	94.68	17.7	73.96	46.79	99.3	67.98	99.97	41.72	27.23	75.45	42.59	98.9	99.27	95.6	56.55	56.01	39.05	99.18	54.16	99.8	5.5	37.43	99.63	6
MYT1	99.44	99.95	36.4	80.26	22.95	99.7	94.5	97.55	48.91	99.76	73.5	97.2	71.71	99.57	20.11	73.08	31.69	80.67	86.45	98.96	77.89	99.39	98.36	6
PKP1	38.12	2.22	10.77	97.39	99.91	13.59	94.27	7.13	24.35	23.33	10.41	99.74	99.82	80.13	64.36	7.14	15.54	24.21	92.95	99.82	99.54	8.22	99.89	6
PLA2G4F	99.43	98.83	27.47	99.35	99.67	52.28	98.3	99.89	66.07	48.57	75.79	97.59	96.68	98.6	97.61	93.28	95.4	55.14	98.39	99.11	2.28	77.95	99.83	6
RPS6KA6	98.09	99.57	77.37	98.94	34.68	9.5	69.53	99.91	99.57	97.9	73.35	97.18	93.04	94.11	13.55	94.55	99.27	99.45	58.9	33.12	93.12	99.58	88.09	6
SLITRK6	99.86	99.79	99.97	16.09	86.36	48.18	99.63	34.08	48.01	95.22	13.99	96.13	99.62	76.39	31.38	19.5	6.78	94.97	99.82	17.88	97.55	1.78	71.24	6
SOSTDC1	86.69	6.36	100	91.5	99.67	5.32	98.56	99.27	49.23	18.36	78.81	95.62	99.33	99.92	24.28	96.07	4.84	97.39	99.77	31.09	13.03	98.59	92.32	6
SPRR1B	54.81	22.11	89.42	11.56	99.62	60.14	99.11	36.37	62.26	70.26	30.87	6.55	99.95	19.35	97.16	37.59	27.95	83.54	99.73	99.65	95.89	4.66	99	6
WDR72	98.89	97.04	40.72	98.08	99.08	13.1	99.76	99.36	91.17	20.54	44.18	99.89	98.3	98.89	4.98	96.59	7.51	92.66	71.61	99.57	56.58	99.3	11.88	6
WNT7B	97.99	78.67	58.57	11.81	99.21	90.82	97.34	25.73	99.16	99.93	19.7	93.85	99.41	15.29	77.43	14.69	25.54	98.01	99.27	99.78	98.58	19.92	32.05	6
AGR2	99.88	99.76	99.17	28.78	16.29	21.74	95.05	81.78	4.81	33.04	2.64	99.62	62.96	87.1	95.34	23.83	26.57	80.92	80.28	67.7	99.18	20.06	9.04	5
AR	97.56	99.68	23.08	8.43	9.42	92.07	7.91	96.93	99.95	19.13	99.89	89.42	16.73	97.96	6.38	26.07	99.54	98.57	28.4	10.76	81.19	99.09	91.83	5
C1QL4	30.79	11.13	99.04	16.8	81.5	90.59	98.51	94.15	99.96	98.98	26.75	64.35	94.36	96.59	68.04	7.55	20.64	99.88	96.5	88.53	11.31	99.47	99.9	5
CA9	98.83	92.55	97.26	35.63	50.59	99.77	85.8	1.82	97.37	17.93	9.48	26.04	97.38	65.51	99.99	24.17	19.84	99.99	99.28	99.89	61.02	95.29	93.15	5
CACNA1D	99.89	99.74	96.87	98.31	7.42	83.98	12.91	97.65	98.71	81.69	25.14	99.04	16.63	98.52	27.88	95.32	99.8	99.14	98.3	98.8	76.29	97.53	89.16	5
CACNG4	84.57	98.75	99.75	98.13	99.23	99.6	93.67	64.85	88.9	98.52	67.7	14.03	20.41	81.53	50.44	92.71	26.63	99.97	98.28	96.57	99.3	2.45	95.63	5
CAPN9	99.44	99.14	99.05	34.66	10.02	16.37	55.09	52.36	51.6	20.99	56.67	99.74	15.43	95.8	98.9	82.76	34.03	76.05	28.29	99.69	96.68	83.08	51.03	5
COL25A1	38.52	14.21	80.03	22.32	22.08	19.37	35.84	99.55	86.32	18.51	90.99	99.96	16.85	96.64	16.9	97.59	97.26	97.08	99.94	17.21	98.39	99.69	99.98	5
CPLX2	96.02	99.4	99.24	99.42	66.97	79.75	84.51	42.32	78.6	97.3	87.04	99.04	82.86	99.43	14.2	36.95	14.22	63.34	64.01	97.54	95.57	40.31	6.52	5
DLX3	92.5	52.62	62.65	99.55	99.55	29.31	96.99	46.7	44.34	88.11	88.59	99.59	75.66	86.41	80.68	11.35	22.76	48.66	99.7	99.47	97.21	31.24	97.91	5
DNAH2	93.46	55.94	99.34	23.73	24.31	15.18	99.04	92.81	67.4	20.76	8.94	92.96	30.05	99.07	99.41	51.06	32.49	59.61	99.93	98.05	97.77	16.82	98.19	5
DSG1	93.89	5.65	98.86	97.93	99.72	59.94	99.89	79.59	72.54	33.69	99.86	97.73	99.4	87.41	44.93	51.17	98.19	57.29	99.69	97.93	85.13	42.03	27.02	5
EREG	7.12	9.21	99.32	99.53	12.91	0.73	99.68	42.47	91.06	13.96	10.75	2.4	15.8	8.01	75.15	2	7.97	5.59	99.64	99.42	85.37	3.11	8.67	5
ESM1	97.12	98.8	97.31	86.18	84.28	79.61	96.28	36.92	82.9	2.35	98.81	97.39	43.8	87.84	99.64	75.61	99.79	96.25	98.34	94.4	99.66	99.87	99.38	5
FAM155B	99.2	97.61	98.34	97.57	97.77	91.97	98.59	82.16	90.51	93.21	13.04	99.09	99.32	95.89	75.21	76.38	99.15	96.65	89.11	94.16	9.96	99.09	85.85	5
FBN3	72.24	10.12	96.17	26.83	98.9	99.94	92.17	99.47	88.4	12.73	6.65	98.29	29.94	99.99	24.76	94.98	10.1	99.9	98.45	95.78	66.9	12.37	99.84	5
FIBCD1	46.23	98.96	99.63	96.62	99.82	95.11	99.68	81.83	81.46	80.44	37.99	35.04	87.99	93.9	99.64	3.06	36.45	98.85	69.16	99.92	49.68	11.33	53.8	5
GJB6	96.36	11.43	97.91	12.76	99.86	13.83	99.08	11	50.69	29.68	16.82	17.44	99.93	7.46	91.11	42.9	24.37	59.96	83.31	99.02	95.18	89.59	99.57	5
GPX2	99.98	23.55	99.87	98.9	95.94	52.3	99.96	24.26	37.53	74.13	5.8	99.84	99.8	70.31	82.16	30.55	0.88	44.52	97.27	43.97	4.79	43.03	3.25	5
GREB1	20.69	99.36	17.68	10.65	15.49	96.3	33.42	82.84	27.09	81.53	99.1	99.26	60.41	99.18	7.9	3.96	99.82	63.23	92.64	19.79	90.87	23.75	26.31	5
GRHL3	99.75	18.36	40.23	99.05	99.66	88.05	72.13	64.53	16.35	91.56	98.11	99.03	99.64	25.19	80.71	42.01	25.28	94.84	93.41	97.24	98.84	4.43	98.93	5
HMGA2	3.37	91.21	99.99	84.23	92.86	28.74	99.92	20.34	94.32	4.46	13.35	19.76	99.1	99.72	85.95	44.48	37.26	17.16	72	81.73	99.89	3.55	96.26	5
IYD	99.04	76.53	99.58	99.36	12.14	76.87	86.32	25.27	70.01	37.55	98.31	99.94	15.43	40.41	25.59	41.8	82.37	36.43	39.56	99.3	92.15	98.78	20.71	5
KIAA1244	99.13	99.38	99.21	42.93	46.82	98.14	88.38	96.97	98.77	97.23	31.45	99.25	87.59	18.52	97.08	89.47	99.37	95.89	96.29	97.49	97.53	97.94	80.04	5
KRT17	30.87	2.48	80.83	24.67	99.41	11.33	98.48	89.46	11.7	37.5	6.99	37.33	99.87	50.74	16.54	15.34	1	80.98	99.99	99.87	99.52	4.1	90.71	5
LGALS7B	28.22	19.39	98.56	73.36	99.53	28.24	88.07	90.11	76.02	60.26	25.74	71.99	99.57	69.17	98.43	48.78	13.91	93.75	99.86	99.73	92.83	14.53	99.44	5
LGR5	84.56	14.04	98.58	95.91	38.14	41.75	8.24	76.44	26.32	99.44	99.64	97.84	24.6	99.9	46.89	76.56	39.42	98.41	95.19	17.69	99.49	6.99	99.96	5
MAGEA2	94.66	27.07	85.74	66.87	99.32	64.8	99.97	35.66	36.05	37.39	42.42	99.66	99.74	68.22	62.17	41.12	90.1	89.36	35.94	99.86	22.08	57.34	95.16	5
MAGEA3	62.68	13.58	60.11	65.67	99.8	45.35	100	43.63	26.7	63.38	12.67	99.46	99.73	14.92	79.04	23.75	70.05	88.06	22.16	99.94	9.94	61.35	98.42	5
MUM1L1	99.03	99.12	25.75	14.22	85.71	39.93	99.54	95.77	9.21	94.4	4.43	83.37	73.55	99.05	4.27	3.38	23.44	99.28	98.35	82.47	74.12	98.26	14.3	5
NOTUM	11.69	9.4	36.94	99.93	91.6	24.77	90.82	48.67	56.29	92.58	99.94	99.21	21.12	96.11	89.1	99.69	41.4	98.86	76.04	99.95	97.99	21.68	29.39	5
ODZ2	3.19	13.11	99	17.44	98.72	52.97	99.53	43.19	32.87	36.93	99.61	28.8	99.76	74.96	6.03	98.78	19.41	99.4	99.33	8.23	96.93	97.22	81.37	5
OPRK1	91.81	14.66	99.23	63.47	99.21	6.53	62.02	74.24	52.55	26.87	44.04	99.4	96.34	87.57	97.36	52.23	27.33	99.16	88.47	95.22	21.91	44.5	99.97	5
PHGR1	99.41	99.61	88.77	99.16	18.02	44.61	75.22	62.1	60.65	59.98	76.6	96.62	56.17	46.9	99.68	49.97	99.69	42.89	45.44	97.44	79.08	44.22	55.75	5
PNCK	99.85	90.69	94.53	77.22	75.77	81.69	95.05	3.04	92.4	95.6	9.25	92.62	99.64	95.27	100	6.62	12.95	99.95	99.48	12.38	93.69	42.72	97.56	5
PTPRT	25.38	99.39	13.46	16.93	13.82	98.55	10.76	95.11	72.34	99.67	24.35	16.25	43.64	99.89	8.26	15.09	99.46	58.08	9.79	13.93	11.65	13.97	99.94	5
RAB3B	91.27	96.55	99.91	10.02	96.71	93.92	99.65	91.43	99.6	24.65	27.7	94.27	98.29	69.91	88.64	99.03	99.02	97.35	95.11	98.94	60.19	36.41	87.44	5
RASEF	98.86	99.75	99.07	48.17	35.46	8.16	12.11	97.33	99.77	5.6	99.4	97.48	26.87	84.89	33.29	88.35	99.78	98.36	93.84	98.66	91.32	98.5	98.9	5
ROBO2	93.41	98.68	6.5	84.87	30.07	99.33	8.44	99.34	42.1	18.78	17.49	89.95	71.83	96.92	34.69	99.14	8.44	99.44	99.89	93.53	84.99	47.79	74.55	5
SHANK2	96.41	95.96	99.89	93.51	44.77	98.03	99.42	92.36	97.26	99.58	98.61	98.21	41.05	97.16	88.62	13.62	97.8	98.25	85.78	94.53	99.19	99.26	34.34	5
SNORD116-4	90.3	95.71	93.26	14.53	3.86	99.98	76.37	99.61	99.98	96.95	88.26	77.2	79.77	98.08	6.42	73.12	99.53	99.6	98.19	13.4	80.54	98.91	98.65	5
SOX3	53.22	47.55	62.23	48.77	47.8	99.5	55.21	46.94	82.6	99.5	53.88	81.66	65.02	99.89	29.95	39.75	81.71	95.32	37.3	23.6	99.21	99.59	80.55	5
SPRR1A	99.29	47.06	98.2	15.45	99.34	67.07	97.76	44.7	68.09	75.56	43.19	33.23	99.98	53.1	99.73	29.63	27.09	77.8	99.22	98.32	80.68	23.26	95.84	5
SSPO	67.4	91.34	16.97	26.44	22.92	97.8	19.36	65.91	89.98	99.19	99.8	87.68	30.19	98.8	31.14	99.92	99.32	95.28	32.95	68.12	96.97	99.45	96.18	5
ST8SIA2	31.83	15.1	88.84	31.86	98.59	96.92	97.07	27.1	73.74	99.15	23.92	88.04	82.78	97.23	55.59	99.22	96.01	98.39	99.22	14.58	99.86	10.34	99.19	5
SYT13	88.77	99.87	99.93	18.84	6.06	26.74	99.77	15.93	77.7	45.54	4.71	87.75	73.67	94.89	96.43	3.48	15.89	98.49	67.95	76.02	99.65	99.56	92.42	5
SYT7	97.26	98.53	98.56	99.51	96.35	97.21	99.1	99.41	23.86	27.9	57.35	99.29	68.22	58.67	27.03	6.79	94.52	62.8	93.27	99.89	34.56	85.74	98.16	5
SYTL5	99.49	99.97	99.16	98.87	41.76	28.06	95.61	97.56	74.4	9.71	33.71	99.22	81.42	79.07	68.65	11.62	24.85	98.37	100	89.25	37.21	2.67	67.24	5
TFF3	82.82	99.74	98.06	96.73	4.23	1.08	8.93	43.28	5.6	4.91	7.88	95.47	8.37	97.12	99.7	6.53	99.59	30.43	8.78	99.73	92.69	99.4	4.98	5
TMEM38A	57.63	28.73	75.71	23.24	82.69	30.87	11.21	99.93	99.34	21.87	98.72	87.13	57.95	86.15	99.54	69.48	91.76	93.52	75.26	88.91	98.11	99.21	99.22	5
UNC5D	86.38	77.9	52.15	36.5	37.62	50.06	69.42	99.64	99.64	13.24	29.75	97.29	87.87	96.16	13.71	89.27	22.9	99.87	99.18	33.27	99	95.81	61.71	5
UPK1B	99.68	38.09	99.45	26.31	29.35	68.66	99.7	3.09	77.92	31.35	12.58	95.33	99.06	71.32	4.49	49.67	18.34	50.48	78.24	63.79	99.07	23.08	8.99	5
ZIC2	15.57	79.81	89.3	11.75	99.65	51.69	54.73	17.78	42.29	12.4	17.2	12.84	99.72	67.87	98.2	53.08	88.2	99.68	99.01	85.9	99.33	35.51	10.28	5

## Sheet: Tsig_SC perc rank
Genes associated with T cell-cold tumors by Tsig-SC method.
The Tsig (T cell identity) signature was used to compute Spearman Correlation (SC) rho values for each gene. In each data set, genes were ranked by Spearman rho (ascending) and assigned to percentile ranks (higher rank = greater negative correlation with Tsig)
Shown are the percentile ranks (in each data set) for the genes identified in the top percentile (>99.0) of at least 5 data sets (column Y).
Symbol	BLCA	BRCA	CESC	COADREAD	ESCA	GBM	HNSC	KIRC	KIRP	LGG	LIHC	LUAD	LUSC	OV	PAAD	PCPG	PRAD	SARC	SKCM	STAD	TGCT	THCA	UCEC	# times in top perc rank out of 23
CMTM4	98.56	97.07	99.97	93.93	98.02	94.44	99.47	99.94	83.99	60.58	90.27	99.85	90.85	92.89	98.08	99.26	99.36	98.38	99.98	99.86	55.82	100	77.24	9
ACVR2B	99.46	99.49	97.95	92.46	73.79	99.47	46.3	99.02	99.15	99.98	52.69	96.06	89.08	99.69	75.45	99.93	88.52	91.61	98.36	96.79	72.31	83.65	98.94	8
AKAP1	99.68	83.14	99.65	97.82	92.44	87.38	77.25	99.48	99.72	95.52	99.41	99.54	89.96	50.88	95.55	75.79	98.37	90.56	99.52	99.21	28.71	98.79	93.93	8
MAP7	99.77	99.55	99.72	97.62	98.33	38.91	98.54	92.12	99.9	28.44	92.77	99.78	99.92	77.57	94.06	87.07	98.28	19.37	43.83	100	90.68	99.61	97.73	8
RCOR2	96.71	68.63	99.83	33.81	99.68	97.64	99.06	85.19	79.83	99.78	11.49	96.64	98.48	99.87	99.63	61.01	18.13	99.8	98.44	99.92	92.69	81.83	93.72	8
TOM1L1	97.19	99.64	99.07	85.42	99.3	24.12	96.21	99.42	99.74	4.77	100	94.12	57.46	44.45	93.74	94.48	97.6	93.68	98.69	98.38	99.3	99.15	64.57	8
ACACA	94.6	98.57	95.83	86.91	98.04	99.52	96.31	91.79	79.44	88.77	93.48	99.84	97.57	92.07	88.19	82.44	99.99	99.67	99.45	99.91	79.24	99.2	83.76	7
ARHGAP32	99.8	97.91	92.4	54.28	94.1	99	83.77	95.2	98.3	97.39	99.6	98.44	99.26	89.86	99.15	83.74	97.16	82.24	99.5	99.83	59.59	48.34	74.72	7
CLDN12	83.91	99.66	99.18	71.62	80.9	75.54	99.02	97.84	86.77	60.09	93.09	77.27	85.48	90.92	99.87	96.27	90.58	99.05	96.41	99.91	99.16	67.88	79.29	7
FAM168B	75.56	78.51	99.98	91.26	99.88	98.85	98.47	99.65	84.63	92.98	97.36	98.49	99.94	99.38	18.6	64.21	83.43	99.81	99.96	95.94	94.01	97.52	98.12	7
GPR125	98.44	69.79	99.8	97.34	91.69	90.2	97.33	84.46	97.87	79.8	82.91	100	97.04	99.91	82.66	97.59	78.94	99.8	100	99.36	48.45	99.41	98.4	7
GTF2IRD1	99.87	88.12	75.19	99.96	94.45	98.05	84.48	88.55	96.21	91.32	98.54	98.34	99.49	75.71	99.58	90.69	73.05	99.88	98.96	99.78	99.54	46.31	96.2	7
HOOK1	98.13	99.36	99.6	94.33	79.12	47.47	59.51	96.51	99.93	32.04	76.54	99.3	90.02	95.53	74.4	99.81	95.47	40.75	35.7	99.43	99.88	98.9	76.09	7
KIAA1804	76.16	34.36	99.98	91.77	87.18	14.18	99.54	78.54	99.28	12.12	88.62	99.34	99.03	98.79	75.82	99.94	76.94	24.36	12.2	99.4	98.69	83.33	97.44	7
MAGI1	96.82	97.2	93.39	54.41	51.62	99.43	51.85	99.72	99.99	76.31	96.55	99.52	49.1	99.61	58.37	62.58	80.22	86.18	44.54	85.75	99.9	99.72	86.83	7
NCKAP1	82.31	95.69	99.6	58.57	99.55	95.29	99.97	99.5	91.95	78.5	80.15	95.06	99.67	59.48	83	82.04	78.27	92.44	99.86	99.28	46.95	84.57	98.32	7
PPME1	91.96	94.1	99.88	91.29	96.46	99.98	99.66	68.83	57.99	76.87	67.45	99.58	99.83	87.56	99.52	77.62	97.64	99.5	95.91	96.76	76.27	93.31	82.34	7
SUN1	98.69	71.71	100	78.25	99.21	87.58	99.84	99.28	94.59	48.97	97.56	96.81	97.81	91.9	99.75	97.62	67.12	95.28	99.97	99.93	73.19	89.04	92.92	7
ZCCHC14	68.85	70.12	99.75	66.63	77.56	99.39	92.33	99.54	99.91	99.76	87.68	92.76	86.51	99.49	58.56	98.14	55.43	93.02	99.88	93.02	87.68	49.04	56.51	7
ZFYVE9	99.28	89.73	95.7	22.32	88.16	97.06	97.89	99.23	94.98	49.04	98.25	99.14	99.14	97.61	28.48	91.12	96.46	92.07	99.32	63.28	67.73	99.74	99.1	7
CAMSAP1L1	63.75	91.2	99.37	34.27	92.9	96.72	99.96	95.58	94.06	92.9	81.17	99.38	99.07	88.87	43.62	88.68	37.96	99.62	99.56	87.34	96.38	91.94	94.39	6
EPCAM	91.84	82.3	99.1	99.94	80.56	45.04	96.47	99.5	90.54	64.05	25.01	99.71	86.95	90.35	99.84	63.61	91.76	51.14	64.58	99.54	92.54	69.3	66.93	6
EXTL2	96.25	72.74	99.01	36.49	75.07	57.13	97.32	96.82	99.73	18.56	82.59	94.36	70.99	99.16	30.19	79.07	96.33	99.69	99.2	72.26	99.62	95.65	50.47	6
F11R	90.97	64.73	63.4	90.61	99.97	20.95	99.13	76.93	91.01	0.76	76.4	99.51	99.07	64.58	99.69	6.83	17.12	8.9	16.53	99.97	83.8	67.53	97.58	6
FASN	99.72	89.38	93.42	61.2	99.77	99.27	96.94	70.12	77.71	98.52	95.48	99.43	94.17	76.89	93.69	30.9	99.67	98.01	94.37	99.59	94.55	95.48	96.73	6
KCTD3	67.47	99.74	84.59	69.63	82.39	86.74	73.34	45.1	73.8	83.64	98.33	93.89	78.86	84.58	89.01	70.35	99.47	92.04	99.84	99.99	99.12	99.9	87.43	6
KIAA1549	87.14	97.18	98.67	96.25	93.69	99.25	91.86	96.76	94.35	95.99	48.58	99.79	95.18	99.99	93.88	99.83	87.8	94.55	99.28	99.58	79.21	96.45	97.06	6
LRP6	83.35	81.69	98.67	80.88	83.68	91.65	75.98	99.44	92.82	87.8	97.14	99.23	72.52	99.48	43.93	95.09	60.68	99.68	99.83	83.5	97.87	99.84	97.07	6
POMT2	52.64	97.6	99.73	38.94	85.99	99.47	96.18	99.06	92.36	81.26	50.97	98.41	96.61	96.44	81.51	78.02	69.19	53.96	99.81	99.71	69.58	99.82	69.43	6
RAP1GAP	99.67	90.35	99.74	42.99	92.04	94.71	99.8	97.98	88.85	75.1	35.5	99.46	88.41	88.52	82.25	40.05	96.88	91.29	64.08	99.79	92.33	99.38	83.83	6
XPO5	41.72	62.63	90.67	93.31	99.39	99.95	99.16	45.32	90.44	81.22	71.21	89.42	99.12	96.65	62.18	63.24	96.08	95.26	99.55	99.68	22.79	91.88	94.3	6
ZNF74	99.89	65.71	92.47	92.04	97.06	95.12	97.27	64.16	66.95	99.86	77.62	99.59	99.88	93.2	49.75	83.95	99.06	94.96	99.93	69.48	55.81	73.82	90.66	6
CASKIN1	99.98	98.95	98.6	42.3	90.44	94.48	98.7	82.5	87.29	93.6	82.87	99.81	98.26	86.69	69.43	79.83	99.88	95.86	99.4	94.15	80.62	99.46	99.26	6
GTF3C2	99.05	59.58	97.25	80.35	100	99.31	95.97	80.08	84.99	95.15	79.24	98.2	91.76	99.74	77.65	99.23	89.36	70.8	98.12	87.79	66.21	95.2	99.02	6
ACLY	86.59	98.41	99.88	73.32	99.77	99.99	99.08	68.86	86.97	62.9	70.01	82.74	93.95	76.4	41.14	48.73	99.89	59.82	97.18	95.65	78.34	75.29	67.07	5
C19orf26	83.06	85.61	99.13	19.47	98.66	99.51	99.83	91.8	93.14	71.73	36.78	95.42	99.84	51.78	50.48	20.54	37.89	83.97	99.94	91.95	96.52	51.21	65.35	5
C1orf27	90.58	98.76	90.35	99.32	68.93	63.31	98.44	67.9	99.7	62.37	99.5	99.44	59.44	77.34	98.6	55.18	97.31	85.21	88.11	99.7	11.87	97	86.15	5
CYP51A1	71.81	98.3	99.93	91.75	95.15	81.46	99.06	99.93	87.47	49.4	97.35	96.23	97.48	33.46	99.07	17.34	84.62	78.85	97.91	99.98	25.83	92.24	70.6	5
DDR1	96.85	96.93	80.35	93.39	99.75	90.42	94.05	93.95	90.38	63.85	23.91	99.97	99.82	58.61	99.89	74.15	38.63	96.27	96.55	99.93	77.74	81.19	86.89	5
DHCR7	96.23	64.32	99.95	90.42	96.04	91.49	99.77	96.17	68.64	61.03	80.61	99.74	98.17	33.47	96.19	27.47	99.7	90.12	89.48	99.9	89.52	67.11	88.55	5
EPB41L5	77.98	99.19	98.89	88.14	53.56	99.67	73.53	99.82	99.79	78.2	99.98	94.57	60.03	84.05	35.55	74.07	88.17	94.44	93.93	95.71	73.24	89.2	89.65	5
ESRP1	99.31	92.42	98.17	98.08	99.9	40.26	93.95	77.66	55.02	31.39	12.83	98.88	99.37	49.17	99.48	32	98.31	79.91	97.13	99.57	41.86	98	97.95	5
FNBP1L	99.89	97.45	99.17	96.16	68.13	91.59	81.8	99.97	100	22.58	94.38	99.96	57.38	97.9	78.33	85.68	98.75	98.32	97.13	98.22	27.8	91.62	92.12	5
HMGCR	95.81	97.75	99.9	86.56	93.97	99.02	67.68	99.1	97.54	85.09	89.19	93.19	94.54	91.68	92.56	43.78	98.7	98.2	98.35	99.67	65.38	99.35	68.76	5
HMGCS1	83.81	74.05	99.8	75.73	92.3	99.76	96.62	99.35	99.98	80.31	89.18	94.21	97.16	54.84	85.24	35.71	88.35	95.33	92.33	99.85	97.99	90.84	86.22	5
ICA1	99.26	95.41	34.92	99.34	35.85	69.06	5.44	85.99	32.75	26.7	34.79	99.96	13.48	67.64	99.91	65.01	98.99	8.3	69.45	99.98	81.06	46.01	77.84	5
KDM4B	99.51	97.23	89.66	47.71	80.69	99.83	57.51	66.56	51.38	100	80.66	60.28	91.11	96.67	91.24	95.13	99.03	99.61	83.55	33.32	83.14	97.48	36.98	5
KIAA1543	99.76	86.81	96.12	96.04	85.19	84.71	91.57	43.76	85.42	96.09	57.24	99.72	97.51	95.11	99.95	91.16	99.24	53.82	50.23	99.15	63.72	81.34	78.67	5
LCLAT1	70.91	79.4	99.53	63.47	99.79	87.09	99.87	81.81	83.88	58.98	84.48	94.14	98.27	85.22	92.91	49.37	99.26	92.1	87.74	97.48	34.89	99.98	95.28	5
LRP5	93.66	70	95.46	83.7	41.57	99.6	87.12	95.07	88.86	94.76	99.13	99.69	82.42	90.49	99.55	46.82	61.97	97.03	98.27	98.15	99.6	92.97	87.08	5
MIPOL1	97.12	99.22	99.95	37.88	69.02	19.38	99.38	99.27	95.01	91.95	78.71	76.64	93.31	78.88	86.35	84.99	91.41	98.96	99.75	96	70.74	93.13	86.91	5
MYEF2	47.79	99.53	19.48	88.62	22.5	99.9	11.94	94.33	99.88	98.47	18.89	95.4	30.51	99.28	40.86	97.04	99.51	88.81	95.52	21.59	98.83	60.33	89.54	5
PLA2G12A	99.99	99.99	93.35	97.59	68.82	42.22	96.11	96.26	96.67	51.26	90.69	99.67	61.79	60.56	77.38	96.2	99.91	97.51	97.65	92.41	95.13	99.97	57.94	5
RMND5A	97.13	95.49	99.29	90.12	95.95	88.9	88.95	96.44	58.48	79.49	99.77	92.28	96.67	99.65	84.98	98.45	93.55	93.12	95.84	99.87	90.38	99.19	98.46	5
TTC3	98.63	95.04	96.51	87.45	51.9	91.69	57.85	94.41	97.62	99.64	62.88	99.03	73.63	99.59	37.81	98.81	99.07	99.28	85.41	53.44	65.76	66.16	84.25	5
ZKSCAN2	88.84	99.88	76.86	60.29	76.05	99.75	29.96	97.3	97.57	98.82	87.42	99.07	66.16	98.24	18.29	95.02	49.45	99.53	99.34	34.62	92.47	94.91	54.92	5
ADNP	94.38	96.21	95.26	96.48	82.26	98.32	76.56	95.04	99.34	85.2	88.68	93.61	90.12	99.53	57.32	97.48	88.7	99.35	99.2	91.61	66.75	79.91	99.37	5
C14orf128	79.01	55.16	92.82	79.39	78	59.14	99.29	99.65	87.18	77.88	94.63	74.65	99.15	94.2	98.34	59.02	12.83	71.6	96.37	99.04	75.64	97.57	99.61	5
KDM5B	98.97	88.65	98.99	49.82	93.75	98.95	99.67	92.08	90.47	98.31	51.87	99.91	98.25	99.77	97.15	94.57	84.13	98.98	98.58	99.53	83.57	31.09	99.55	5
L2HGDH	91.13	97.69	99.76	41.26	87.88	93.94	94.32	99.85	99.86	96.34	99.47	79.55	93.06	88.96	78.54	96.3	98.77	98.33	95.04	97.5	89.6	97.45	99.78	5
MYO10	22.47	40.18	99.84	96.63	93.81	97.18	99.3	99.03	85.68	88.39	21.04	99.7	95.52	91.37	95.44	13.84	82.9	76.42	91.95	98.51	94.98	96.37	99.94	5
PCYOX1	80.45	99.54	99.35	45.24	93.55	67.83	99.61	98.19	87.9	44.45	99.99	98.79	98.87	97.59	45.85	36.3	89.65	58.84	93.01	90.04	22.13	95.66	99.97	5
TET3	99.21	46.32	99.99	82.86	99.98	96.55	97.98	19.48	62.41	94.82	80.09	73.09	99.45	98.47	68.12	62.99	90.55	64.4	78.13	94.21	68.38	21.78	99.8	5

## Sheet: Csig_LFC perc rank
Genes associated with T cell-cold tumors by Csig-LFC method.
The Csig (cytolytic activity) signature was used to stratify tumors into tertiles. In each tumor data set, genes were ranked by log-fold change (LFC) and assigned to percentile ranks (higher rank = greater overexpression in Tsig-low tertile)
Shown are the percentile ranks (in each data set) for the genes identified in the top percentile (>99.0) of at least 5 data sets (column Y).
SYMBOL	BLCA	BRCA	CESC	COADREAD	ESCA	GBM	HNSC	KIRC	KIRP	LGG	LIHC	LUAD	LUSC	OV	PAAD	PCPG	PRAD	SARC	SKCM	STAD	TGCT	THCA	UCEC	# times in top perc rank out of 23
FREM2	99.74	94.13	99.99	99.99	100	99.17	99.77	92.74	99.59	8.86	58.73	99.86	99.49	99.7	43.87	95.79	13.33	97.93	99.6	99.99	97.05	97.33	99.81	13
RASEF	98.47	99.61	99.05	78.37	97.03	15.16	70.06	99.41	99.59	6.06	99.99	96.01	28.99	69.79	88.72	99.82	99.91	99.23	87.21	93.99	97.11	99.12	99.94	10
SOSTDC1	67.22	8.29	99.98	99.64	99.8	23.44	99.89	99.49	99.69	76.64	85.08	99.19	99.6	99.62	65.85	7.28	6.47	98.54	99.79	98.08	80.41	98.73	96.77	10
CACNA1D	99.91	99.75	99.78	98.68	97.93	71.86	73.47	99.02	99.16	91.67	97.03	99.74	35.27	98.95	88.38	98.07	99.98	99.4	97.32	99.16	93.29	97.69	97.06	9
CASKIN1	99.33	99.07	97.29	17.55	95.59	99.37	99.72	84.94	97.01	98.95	98.94	99.27	98.86	96.81	97.05	98.19	99.77	99.2	99.97	95.48	77.44	99.24	96.13	9
RCOR2	96.97	26.91	99.34	14.33	99.16	99.75	99.59	79.15	68.47	99.19	44.12	78.29	99.52	99.64	99.41	58.54	17.11	98.88	99.66	98.09	84.67	93.18	97.39	9
SNORD116-4	92.05	97.93	93.57	34.51	4.02	99.95	97.07	99.7	99.98	96.75	99.82	91.3	94.56	98.54	14.29	98.28	99.78	99.61	99.04	90.39	72.64	99.72	99.19	9
TOX3	99.98	99.47	100	97.26	98.23	98.54	95.36	99.77	99.76	98.96	99.09	99.83	51	99.87	98.76	97.13	97.39	97.15	96.88	80.8	99.69	27.72	9.32	9
HMGCS2	100	96.76	99.39	99.98	99.78	57.2	63.84	98.14	28.47	92	85.09	99.85	14.46	95.26	99.67	24.11	48.98	21.16	62.35	99.81	99.99	95.47	90.7	8
PLA2G4F	99.36	98.09	80.27	98.9	99.97	41.93	99.03	99.86	32.51	41.82	91.61	99.3	97.53	99.06	99.64	95.86	93.54	54.05	98.4	99.29	2.21	83.71	98.96	8
SLC9A2	99.8	12.6	99.9	97.57	99.8	31.3	99.3	99.77	92.61	97.78	42.68	97.88	99.02	91.66	93.12	99.14	98.64	51.74	58.83	97.72	89.11	96.51	99.48	8
AR	98.09	99.72	95.64	18.15	17.03	95.04	20.8	99.69	99.96	26.71	99.12	96.39	21.36	94.66	10.17	16.64	99.84	99.36	40.82	84.53	89.88	99.71	96.39	7
CECR2	99.55	80.63	59.91	94.95	85.32	99.29	92.99	94.76	77.05	96.81	98.03	99.93	98.37	99.81	15.46	99.95	99.86	91.28	99.77	89.38	11.9	96.26	78.41	7
FBN3	70.73	7.3	99.36	24.53	99.95	99.98	96.13	99.65	89.38	9.78	65.29	98.79	77.66	99.98	32.81	97.57	6.52	99.92	96.81	97.59	74.27	15.56	99.88	7
KIF1A	97.57	6.06	99.41	28.73	96.8	98.88	96.16	96.06	64.23	94.78	59.24	92.21	90.53	99.92	79.83	87.81	98.99	99.88	99.88	99.64	98.5	99.93	99.18	7
LGR5	94.62	9.93	98.74	99.39	98.72	90.7	13.26	60.58	19.61	99.55	99.18	99.4	95.01	99.75	69.44	27.58	60.43	98.54	78.86	44.93	99.93	7.6	99.96	7
LONRF2	98.14	99.82	98.64	14.29	44.88	92.83	95.44	99.59	94.57	91.88	99.37	99.23	97.67	93.56	43.25	93.21	97.97	99.94	99.7	99.54	95.12	81.1	88.99	7
MYT1	99.56	99.77	89.91	14.86	82.44	99.94	95.81	91.76	28.68	99.36	80.94	94.58	89.06	99.39	62.21	89.01	81.3	77.66	87.03	99.47	76.42	99.48	91.7	7
RAP1GAP	99.28	93.6	99.86	58.64	99.62	95.66	99.34	99.29	95.66	92.37	92.88	99.97	88.45	78.14	98.48	97.44	98.64	98.74	80.11	97.68	85.28	99.15	95.53	7
RPS6KA6	98.68	99.45	89.57	99.89	71.91	45.43	97.17	99.95	98.95	98.26	78.52	93.56	96.42	93.84	34.06	99.49	99.8	99.66	73.34	97.71	93.96	99.78	89.31	7
SLC16A9	98.15	92.85	99.67	99.15	99.34	81.04	99.17	28.23	99.95	92.92	10.87	89.81	97.62	83.52	87.77	29.88	45.19	99.21	52.2	99.37	26.1	45.32	95.41	7
SLITRK6	99.75	99.74	99.62	97.11	13.9	73.2	98.69	75.06	18.56	94.44	34.78	99	99.68	60.08	33.67	33.59	14.34	74.68	99.61	95	99.48	2.36	83.77	7
WDR72	96.43	94.89	93.37	98.85	99.79	27.5	99.83	99.67	96.74	23.65	67.57	99.38	97.55	98.32	16.39	99.33	13.62	94.1	87.28	99.61	60.26	99.2	12.52	7
CAPN9	99.54	99.11	99.63	97.91	95.88	26.43	87.86	66.98	44.16	55.05	69.9	99.43	15.68	88.09	99.31	68.79	32.64	67.17	32.6	99.1	98.69	95.67	53.83	6
CNTFR	79.36	9.85	18.56	47.05	33.2	99.53	26.51	76.86	72.88	96.05	63.42	69.96	83.05	99.88	1.43	57.43	18.57	99.91	99.4	99.48	95.54	99.51	98.73	6
COL9A3	92.41	6.03	70.51	98.98	99.3	99.94	96.13	24.66	95.84	13.77	72.28	63.52	72.98	99.89	97.09	94.27	12.23	98.16	96.82	99.8	82.33	99.82	99.31	6
CYP2W1	97.73	51.9	98.94	96.63	99.59	50.12	99.73	73.3	57.76	72.99	76.51	88.32	99.12	99.56	99.32	12.81	6.41	67.64	91.34	98.6	99.82	97.79	89.52	6
EPCAM	95.74	67.98	99.23	93.92	99.71	64.73	99.65	99.28	90.57	91.47	98.36	93.89	90.23	47.17	99.34	99.58	96.46	89.97	85.44	58.54	77.56	65.27	36.55	6
FAM155B	99.18	95.86	88.96	99.48	76.81	86.59	99.71	98.12	83.14	87.26	72.9	98.23	99.47	96.71	95.43	72.25	98.79	96.27	97.81	99.49	15.71	99.46	90.97	6
FAM3B	99.89	27.15	99.34	95.66	99.26	1.21	13.17	86.89	2.4	6.31	77.68	99.5	12.44	25.09	77.62	10.77	20.67	6.34	8.1	99.71	97.72	7.29	99.79	6
GGT6	99.6	24.98	93.42	94.63	99.4	39.83	50.54	99.66	29.09	37.72	73.85	99.87	97.43	17.65	34.17	25.33	2.23	41.55	94.67	98.46	99.18	14.06	99.79	6
GPR81	98.89	99.51	96.81	99.22	69.47	75.71	92.7	98.81	72.22	9.12	26.35	99.3	15.37	76.38	94.77	81.25	99.54	96.31	83.32	99.11	5.26	84.42	99.52	6
GPR98	96.34	99.33	93.66	69.86	82.86	99.47	71.31	91.03	85.44	99.12	20.59	99.45	88.69	98.96	50.29	15.46	95.72	94.59	99.43	97.87	87.64	99.88	90.71	6
KIAA0754	89.81	34.34	98.51	20.32	50.23	99.39	94.1	99.52	99.84	79.75	99.86	85.93	71.94	91.42	58.54	82	99.47	97.99	98.6	56.63	91.2	99.37	89.82	6
KIAA1244	99.09	99.08	99.85	89.34	98.77	97.03	98.43	99.48	96.85	97.23	98.23	98.97	90.75	19.38	99.29	96.49	99.87	96.01	98.98	92.4	91.76	98.23	95	6
MSI1	95.6	63.02	96.93	96.36	98.57	94.59	99.57	15.66	23.71	42.94	19.72	64.17	99.7	99.54	78.14	94.99	96.48	99.7	98.57	99.85	87.91	99.85	88.21	6
NCOA2	90.28	96.84	97.71	27.8	91.19	93.99	85.56	99.44	99.85	94.71	99.97	90.09	30.1	58.24	78.31	98.19	99.71	99.06	86.04	52.5	73.54	96.77	99.53	6
PHGR1	99.58	99.6	91.7	99.37	99.75	47	69.82	59.46	44.79	50.62	32.91	82.43	68.2	47.12	99.88	56.02	99.85	33.11	45.28	95.03	92.18	45.19	46.16	6
PPP1R1B	98.64	9.84	99.98	99.07	99.99	34.8	99.54	96.45	14.17	74.69	31.82	99.98	91.83	34.33	95.4	98.18	17.64	95.03	57.54	96.22	51.18	2.52	99.12	6
PRR15L	99.04	96.42	98.63	89.43	99.5	25.81	20.61	99.53	94.02	39.74	99.64	99.25	10.15	26.9	96.56	85.46	65.71	55.37	32.52	58.87	99.72	91.74	79.42	6
PTPRT	29.61	99.83	94.36	21.96	16.57	99	64.26	75.48	58.28	99.95	65.67	89.19	87.85	99.92	59.28	8.42	99.81	83.63	11.22	95.88	79.78	20.3	99.94	6
RHCG	6.13	2.59	0.97	99.51	9.69	50.02	77.89	99.87	10.26	17.36	81.7	10.08	99.92	94.6	77.19	16.6	1.88	38.97	99.53	99.8	96.81	33.82	99.26	6
SHANK2	97.31	96.05	98.75	96.88	94.86	99.15	98.44	94.33	92.51	99.75	99.43	98.44	40.34	95.84	93.1	99.33	98.67	96.48	86.2	97.34	99.24	99.4	68.19	6
VTCN1	98.29	10.93	99.96	34.93	96.57	32.29	98.11	99.17	14.65	92.87	82.98	99.29	99.89	1.81	12.14	78.75	0.57	95.21	96.38	98.99	99.48	1.41	99.24	6
WNK2	92.97	77.86	98.2	98.41	98.98	98.53	94.21	90.7	99.07	98.7	69.98	97.41	96.92	99.45	97.29	99.34	58.5	99.44	99.36	99.4	70.29	97.6	88.73	6
ZNF704	97.04	95.04	99.41	97.67	99.43	99.64	58.72	98.75	97.95	92.01	98.4	99.37	89.65	69.65	22.16	95.85	90.24	99.17	98.92	97.49	89.24	98.45	99.2	6
ABCC8	63.34	99.96	86.05	34.67	98.84	99.15	54.3	59.76	93.93	99.84	86.93	94.75	94.99	87.98	91.69	20.32	92.72	84.04	67.1	99.07	74.51	99.98	46.71	5
AGR2	99.68	99.77	99.5	25.82	98.06	25.56	98.82	72.13	3.36	29.14	4.08	99.04	42.09	77.28	94.23	29.04	72.16	52.83	82.78	13.03	99.97	25.78	10.44	5
BCAS1	99.93	99.62	99.77	89.47	99.51	25.46	75.92	51.89	60.27	80.14	71.6	99.81	28.12	95.65	81.89	17.28	63	5.64	11.14	96.21	94.27	9.05	13.99	5
BMP7	99.38	11.49	85.82	97.41	99.65	98.82	98.31	98.68	98.48	79.33	64.87	41.2	99.54	99.64	81.97	97.67	17.53	95.9	84.71	99.99	98.05	94.98	65.97	5
C9orf152	98.72	98.79	99.51	96.33	99.93	42.07	89.74	74.24	31.15	30.72	99.19	99.8	10.48	49.49	92.81	28.41	99.17	24.31	29.97	92.97	96.77	97.91	35.87	5
CACNA2D2	97.08	99.76	92.42	96.92	21	95.74	35.42	61.07	97.94	98.85	28.67	99.84	20.03	99.68	53.06	95.53	98.46	98.06	17.75	97.61	7.34	99.31	99.22	5
CAPN13	99.47	98.9	99.55	98.48	96.97	71.15	84.89	19.85	89.3	84.99	95.14	99.82	9.32	52.07	98.33	11.98	4.33	63.67	65.93	99.16	20.3	72.06	99.55	5
CAPN6	71.41	1.41	99.28	99.66	28.14	79.02	5.77	20.09	37.32	21.83	31.81	99.05	9.39	98.45	10.92	13.94	11.04	100	11.63	97.33	99.8	7.81	33.16	5
CAPN8	99.11	99.7	99.6	97.94	99.21	15.05	84.54	55.6	12.97	63.74	73.03	99.52	6.83	13.02	98.98	20.19	0.96	60.52	51.83	12.66	94.08	6.86	27.77	5
CDKL5	93.19	93.05	94.26	19.76	62.28	93.38	95.84	99.83	99.88	93.17	99.58	95.44	46.04	81.17	52.76	97.51	99.22	97.01	99.21	30.64	80.31	95.87	97.36	5
CEACAM5	87.14	99.63	99.75	98.75	99.87	59.25	44.38	26.72	18.14	47.59	46.5	98.13	86.96	5.76	99.51	30.64	2.17	20.34	93.2	97.91	99.37	17.09	29.03	5
CHP2	99.63	27.41	99.48	99.77	99.88	28.4	99.94	53.28	73.87	93.32	97.3	44.59	98	96.42	10.98	44.16	1.6	56.56	80.22	98.62	97.86	63.69	90.7	5
CLDN3	97.88	64.25	99.94	97.86	99.53	36.3	90.49	31.8	97.8	38.14	97.16	98.41	16.13	14.65	98.43	99.7	54.25	78.18	20.03	99.64	99.06	18.88	28.88	5
CNTN3	98.24	91.74	91.32	99.12	15.01	74.7	74.62	99.94	91.63	99.89	94.05	90.26	13.84	96.73	62.06	98.98	94.39	95.5	97.26	81.16	97.7	99.59	99.76	5
COL2A1	54.5	99.41	93.22	95.76	40.31	91.56	96.46	48.07	70.6	13.33	96.93	98.09	97.8	100	89.08	94.46	99.11	99.98	98.17	97.62	99.87	47.6	56.91	5
COL4A6	87.59	91.88	7.49	80.96	4.02	16.13	99.07	92.98	12.86	13.53	8.21	78.45	99.81	99.68	11.86	2.76	7.36	99.94	95.21	97.99	99.36	98	77.19	5
CRABP1	97.41	3.54	97.77	80.63	99.14	98.52	24.57	89.07	37.56	22.94	67.33	32.41	17.41	94.57	8.24	0.41	23.98	99.98	99.05	99.79	87.59	98.89	100	5
DCX	56.24	19.81	86.99	72.6	54.87	99.93	49.87	76.68	89.46	99.04	94.45	81.18	39.54	91.07	28.9	99.19	31.9	99.99	96.58	95.13	99.87	34.85	98.61	5
DDI2	91.98	94.94	97.44	17.61	94.47	72.64	94.14	99.03	99.36	73.58	99.93	89.66	84.17	75.19	40.03	87.2	99.72	91.01	86.41	73.67	72.89	98.09	99.36	5
DKFZp686O24166	32.3	98.27	99.09	89.13	99.68	98.74	98.61	99.84	99.85	97.81	86.64	28.63	98.29	79.46	96.41	98.71	88.82	97.53	99.72	91.26	77.3	98.92	96.08	5
DUSP9	92.27	5.57	4.09	49.92	62.17	95.13	99.86	78.39	93.82	99.61	20.57	58.45	97.59	97.93	93.06	89.7	35.56	99.4	99.65	97.69	90.04	17.05	99.48	5
EEF1A2	99.88	99.96	86.8	23.09	97.89	78.85	98.6	92.11	96.65	79.73	99.42	97.17	63.39	31.88	98.39	80.56	32.15	99.81	97.28	99.78	84.41	93.94	32.47	5
ERBB4	97.99	99.95	99.11	67.73	18.07	98.9	28.92	99.5	61.28	96.55	41.73	97.22	20.43	78.47	14.57	99.59	33.54	94.52	68.79	95.21	99.24	95.82	97.55	5
FADS6	99.61	62.01	93.11	97.4	99.55	80.13	99.42	48.94	90.78	94.8	95.43	98.04	99.5	69.67	87.22	59.55	60.98	74.68	89.45	98.98	95.74	89.23	99.71	5
GJB1	97.6	95.41	99.81	99.32	94.01	33.37	75.62	79.22	86.84	87.56	92.93	99.99	9.96	4.79	88.92	43.74	99.32	19.04	78.31	95.52	99.45	97.45	13.66	5
GPC3	98.36	33.14	99.76	10.64	99.46	8.31	97.55	69.77	38.45	3.75	61.62	97.06	99.04	95.9	4.56	7.49	15.44	94.99	87.8	95.28	99.98	17.89	99.8	5
GSTA1	99.12	5.91	99.99	97.61	98.6	25.76	99.96	1.45	3.75	41.71	14.8	97.69	99.38	97.13	18.71	9.81	1.61	82.2	73.69	99.71	96.42	34.76	73.19	5
HS6ST3	99.78	96.31	96.63	26.75	95.25	85.13	73.77	99.36	55.63	46.36	84.85	93.29	93.03	25.55	25.33	95.3	39.8	99.74	90.32	99.12	96.36	99.84	97.19	5
IGSF9	95.7	48.59	71.63	80.34	99.15	99.19	86.63	72.81	75.29	22.66	60.69	96.13	96.41	92.3	99.57	78.96	44.68	97.74	99.25	91.08	94.55	14.05	99.47	5
ILDR2	82.87	79.23	63.78	68.57	99.8	99.57	60.12	99.4	99.27	76.59	99.84	92.91	25.79	96.07	28.94	89.54	27.29	94.7	97.9	98.02	88.73	91.31	95.19	5
IYD	99.14	55.97	99.88	99.33	99.81	80.36	95.23	96.15	97.16	40.86	96.66	99.93	25.83	57.39	92.15	35.2	71.05	29.64	44.11	98.98	97.02	98.2	54.48	5
KIAA1549	90.66	94.44	99.56	96.57	99.24	99.32	99.02	95.24	93.02	94.15	45.33	98.52	98.26	98.48	93.65	98.86	98.49	97.96	99.99	93.85	77.19	96.92	95.22	5
KLHL23	89.09	93.55	98.92	83.9	98.73	97.39	98.5	87.2	98.64	97.38	99.96	90.27	88.82	94.1	96.79	95.05	99.57	99.8	98.62	81.68	94.85	99.2	99.66	5
KSR2	99.82	99.4	96.2	60.88	99.41	80.08	96.26	10.75	94.62	99.93	70.75	98.54	17.7	93.85	79.24	99.92	96.52	67.1	6.33	97.42	12.94	89.57	58.75	5
LPPR1	97.7	17.8	96.56	98.3	97.99	98.08	99.58	99.67	99.96	98.47	91.05	99.9	93.66	97.92	61.21	35.68	99.84	98.66	87.22	97.22	96.07	4.66	71.89	5
MAPK4	97.11	6.92	25.9	20.06	20.55	74.25	19.46	99.72	56.84	35.29	35.32	37.5	23.51	99.55	30.61	74.25	50.12	99.87	36.67	99.11	73.45	98.85	99.85	5
MUM1L1	98.46	99.26	85.54	26.58	23.36	73.35	99.66	33.59	37.35	98.45	17.87	95.3	93.69	98.94	6.74	9.62	46.46	99.54	99.56	91.9	91.5	99.36	19.48	5
NKAIN1	92.05	99.91	64.62	18.46	81.85	99.51	97.47	23.23	23.5	97.87	63.57	67.33	99.08	98.49	21.78	92.1	99.25	91.91	99.64	97.62	86.56	89.67	92.47	5
OCLN	97.87	97.89	97.35	82.48	99.19	84.87	91.85	99.45	99.42	38.44	99.66	99.03	55.85	54.05	95.39	93.33	95.92	91.15	97.12	71.15	84.63	96.11	91.8	5
PALM3	99.39	65.31	98.7	99.29	97.72	89.51	97.19	27.07	88.22	8.93	67.89	99.33	72.62	87.03	90.13	99.93	6.42	99.25	93.16	97.86	5.56	9.24	50.23	5
PCDHGB1	20.41	33.03	33.13	14.65	60.39	99.98	96.08	95.41	99.02	78.33	85.8	67.62	89.59	99.29	94.61	78.01	99.44	94.25	97.1	87.94	79.63	87.41	99.53	5
PCSK2	58.39	43.1	95.81	30.68	29.79	99.3	94.6	62.72	39.64	99.11	33	99.97	97.68	99.61	81.92	89.44	6.78	93.29	99.93	82.6	98.6	7.17	86.94	5
PNCK	99.58	76.67	21.95	94.23	5.59	83.94	98.64	0.92	34.48	98.32	38.36	69.86	99.41	96.21	99.98	16.42	14.07	99.53	99.15	95.77	86.11	44.68	98.81	5
PRAP1	98.84	33.29	95.34	99.57	99.94	50.11	98.73	2	10.65	84.59	82.84	9.1	57.25	99.13	90.42	66.84	65.53	76.53	75.58	99.83	99.37	63.17	83.45	5
PRKG2	80.25	75.49	98.6	20.76	99.06	66.85	97.11	99.33	94.6	99.85	41.06	13.38	95.93	71.66	93.42	77.3	99.26	39.15	17.49	98.03	87.36	60.37	99.65	5
PTPLB	35.69	94.13	94.8	39.61	96.69	62.39	96.66	99.54	99.77	85.04	100	74.64	66.18	53.77	85.74	96.68	99.73	98.15	88.13	58.03	86.06	97.57	99.62	5
RAB3B	91.73	94.85	97.15	9.7	95.97	95.91	99.64	98.18	99.82	71.55	96.68	21.51	99.14	95.61	93.19	99.53	99.59	94.31	97.25	97.94	15.9	51.89	95.33	5
ROBO2	96.1	99.15	63.09	98.63	96.4	99.41	88.9	93.36	87.97	63.52	25.49	99.71	95.63	96.47	44.2	83.29	9.75	99.32	99.59	98.49	94.67	40.06	61.54	5
SBK1	99.36	86.97	99.43	18.47	97.09	99.77	84.12	12.51	99.13	93.33	14.31	99.78	98.64	97.36	25.98	91.84	97.64	98.43	12.61	76.73	67.78	75.34	90.94	5
SLC6A10P	97.9	35.81	84.84	34.6	67.5	82.18	99.34	73.15	89.37	85.91	73.35	79.35	99.45	99.87	98.13	28.52	85.51	99.13	98.27	97.39	69.59	68.55	99.85	5
SLC7A4	99.49	98.86	32.17	98.25	98.96	39.28	99.56	66.96	6.63	87.03	7.39	97.76	99.44	92.18	99.87	86.82	21.55	7.08	54.27	99.92	8.67	9.41	98.38	5
SLC9A4	99.73	22.27	99.66	96.64	98.22	18.03	99.32	98.75	36.71	39.51	67.67	79.25	99.17	92.2	96.02	63.46	24.98	24.98	30.67	92.18	80.52	20.38	99.46	5
SOX11	27.98	9.74	96.4	30.94	78.27	99.73	95.18	31.33	12.67	80.22	94.1	99.72	97.28	99.7	94.76	12.91	36.1	97.04	97.52	43.31	99.96	13.6	99.93	5
SOX21	96.11	25.41	99.44	19.64	99.32	84.43	99.22	75.75	46.9	87.23	72.37	7.61	99.7	97.24	96.87	19.98	20.13	84.12	93.34	96.49	99.59	33.9	93.68	5
SYT13	88.43	99.8	99.49	55.08	28.39	81.88	99.65	96.12	88.19	97.41	20.65	35.59	93.62	95.82	94.24	11.85	37.69	99.09	86.53	94.95	97.72	99.63	90.56	5
SYTL5	99.35	99.94	98.65	99.43	99.67	10.65	98.77	98.16	29.65	13.87	37.55	98.92	94.73	92.34	90.04	17.4	28.11	96.04	99.99	96.07	85.03	2.62	89.51	5
TMEM38A	69.79	28.84	89.29	24.06	97.46	47.61	21.96	99.88	98.32	55.18	99.45	80.13	66.46	89.58	99.46	88.79	93.22	96.99	84.1	74.37	97.33	99.3	99.56	5
TMPRSS2	99.85	15.86	99.37	82.71	98.64	23.18	33.2	99.2	96.03	33.37	92.66	99.72	11.44	97.39	97.87	17.49	92.42	38.08	65.53	56	99.8	13.99	89.66	5
UGT1A10	99.61	29.78	70.06	99.8	99.1	45.37	99.98	6.04	32.09	49.68	89.94	89.1	97.46	67.18	94.94	55.5	18.6	24.03	28.53	99.55	70.82	59.61	84.67	5
UGT1A6	99.03	12.19	25.67	99.76	99.42	46.15	99.95	10.1	9.17	43	59.29	20	99.77	93.21	74.85	22.45	3.6	16.63	60.17	97.01	89.3	92.77	69.03	5
UGT1A9	99.15	26.62	32.86	99.34	99.7	60.71	99.9	14.73	8.62	60.34	96.32	22.7	99.71	77.03	97.55	40.63	11.72	25.55	53.11	98.79	82.49	78.94	79.45	5
UPK1B	99.81	23.25	99.83	42.53	10.52	69.8	100	14.11	98.01	38.89	36.23	73.99	99.92	13.98	14.22	49.48	18.24	60.14	84.82	94.32	99.7	23.14	6.89	5
USH1C	89.82	20.09	99.17	95.64	99.48	94.24	98.03	3.97	97.23	99.94	96.69	27.54	95.59	99.33	99.28	7.66	14.92	94.71	77.43	77.43	93.23	96.22	13.42	5
VWA2	82.5	99.16	99.46	98.16	99.72	63.08	94.27	80.48	74.46	37.38	35.02	99.57	30.54	96.46	95.81	43.93	77.25	42.26	53.67	99.98	98.45	13.24	94.99	5

## Sheet: Csig_SC perc rank
Genes associated with T cell-cold tumors by Csig-SC method.
The Csig (cytolytic activity) signature was used to compute Spearman Correlation (SC) rho values for each gene. In each data set, genes were ranked by Spearman rho (ascending) and assigned to percentile ranks (higher rank = greater negative correlation with Tsig)
Shown are the percentile ranks (in each data set) for the genes identified in the top percentile (>99.0) of at least 5 data sets (column Y).
Symbol	BLCA	BRCA	CESC	COADREAD	ESCA	GBM	HNSC	KIRC	KIRP	LGG	LIHC	LUAD	LUSC	OV	PAAD	PCPG	PRAD	SARC	SKCM	STAD	TGCT	THCA	UCEC	# times in top perc rank out of 23
FAM168B	61.55	79.04	99.24	98.93	99.99	99.61	99.91	99.97	87.84	99.51	99	96.17	99.99	99.92	26.31	65.73	97.16	99.83	99.97	99.93	97	99.07	98.85	13
AKAP1	98.86	80.14	99.96	99.89	99.89	96.97	92.96	99.73	99.72	94.96	99.99	99.95	92.85	50.88	98.38	90.1	99.03	88.61	99.92	91.68	20.69	98.06	98.62	9
GPR125	92.84	65.17	99.86	99.93	98.41	94.83	99.26	91.5	99.05	92.03	77.16	99.97	99.36	98.3	87.8	94.47	88.75	99.79	100	97.46	59.31	99.54	98.56	9
TOM1L1	95.15	99.35	99.75	96.69	100	27.56	99.8	99.77	99.56	13.7	100	96.43	65.8	47.54	98.72	98.61	99.69	91.75	98.31	63	99.9	98.85	76.42	9
ACACA	90.77	95.81	80.58	88.61	97.71	99.89	99.49	98.9	83.15	91.15	99.06	98.92	98.83	89.66	98.11	92.99	99.97	99.12	99.41	99.42	68.99	99.08	84.8	8
ADNP	95.09	94.38	99.27	97.7	96.91	98.72	90.08	99.22	98.2	74.86	99.4	86.37	96.3	99.83	61.99	99.27	95.45	99.92	99.68	96.16	79.83	88.99	99.9	8
CMTM4	92.78	93.45	99.8	97.45	99.86	96.42	99.97	100	82.96	95.23	97.73	98.77	92.21	85.66	99.6	79.92	99.9	96.75	99.98	97.38	63.9	100	80.99	8
GTF2IRD1	99.38	81.98	85.94	98.89	81.43	98.21	93.24	88.11	93.38	68	99.3	89.4	99.9	60.11	99.72	95.9	77.14	99.33	99.02	99.3	99.87	40.19	87.4	8
LRP6	86.61	85.01	99.72	93.35	99.59	97.49	96.88	96.56	89.65	87.95	95.87	99.44	87.78	99.8	69.52	92.12	77.78	99.54	99.95	83.36	95.09	99.97	99.36	8
PREPL	94.11	99.67	99.58	96.54	99.96	74.45	94.89	98.4	94.58	73.04	98.22	99.44	74.72	99.14	74.84	93.54	91.95	99.28	98.15	99.36	91.28	99.24	98.61	8
SUN1	95.32	71.83	99.67	86.03	97.19	82.69	99.93	88.46	92.52	43.7	99.91	95.48	99.24	76.05	99.7	99.92	75.78	98.36	99.97	99.83	72.15	90.9	88.06	8
ATRN	81.64	96.22	97.12	45.42	96.62	94.72	99.05	99.94	96.81	93.28	99.52	98.01	99.4	97.23	49.95	97.64	95.9	76.35	99.61	91.13	60.28	99.99	99.16	7
BCL7A	91.46	90.76	81.67	65.36	74.49	99.63	94.6	97.74	99.11	99.4	99.67	98.9	96.33	99.25	48.51	99.22	82.99	99.7	96.84	50.54	52	92.53	94.22	7
FREM2	96.52	66.45	99.42	99.74	99.55	93.64	94.39	84.87	99.75	27.28	47.78	98.31	94.52	99.11	47.89	66.67	28.53	79.94	83.91	99.75	97.17	92.86	99.2	7
GSK3B	85.23	91.63	85.69	99.8	99.35	98.06	98.27	99.31	99.4	83.64	97.68	85.36	99.11	97.23	69.46	96.61	98.21	94.32	99.03	84.35	79.1	69.86	99.38	7
KCTD3	68.32	99.84	73.02	77.82	98.71	83.09	91.82	71.07	75.87	79.33	99.37	74.97	76.61	85.54	91.62	83.1	99.95	98.02	99.83	99.83	99.74	99.56	98.68	7
KDM5B	96.21	88.04	88.49	95.74	89.06	96.49	99.54	91.52	83.3	93.46	88.87	99.22	99.23	99.8	99.4	91.93	92.11	98.49	98.92	99.92	75.95	41.11	99.92	7
MAGI1	99.23	98.82	99.38	87.58	96.19	99.5	91.94	89.9	99.89	89.28	97.8	99.98	73.59	98.96	84.01	18.62	83.15	89.1	54.32	95.41	99.91	99.95	93.75	7
SHANK2	93.84	92.54	95.64	99.25	73.53	86.42	90.74	95.27	92.13	99.57	99.84	99.52	45.73	96	85.93	92.79	99.47	68.67	62.72	97.43	99.8	99.16	58.97	7
TET3	99.07	42.49	99.71	92.73	99.86	97.19	99.81	34.13	66.25	94.05	98.2	69.95	99.87	99.65	82.99	55.19	96.67	73.77	83.31	97.85	84.07	33	99.84	7
TMED4	95.7	96.43	94.77	87	96.46	45.78	97.64	99.37	99.14	36.09	99.57	98.81	84.79	89.66	97.89	95.46	99.27	96.72	94.19	78.62	99.68	99.94	99.75	7
ZNF664	98.74	99.1	99.74	96.25	97.65	99.38	98.92	99.96	89.11	84.17	88.96	93.79	86.65	99.44	86.83	96.28	99.54	96.41	99.55	80.65	86.44	98.43	95.3	7
ZNRF3	80.48	94.84	99.26	96.63	98.69	85.66	99.68	99.48	99.8	87.31	99.04	99.82	99.4	94.66	75.58	70.32	94.9	97.38	95.46	78.64	36.64	32.64	83.89	7
ARHGAP32	98.41	98.11	84.21	46.96	95.51	99.38	90.79	89.06	97.34	100	99.78	98.21	99.24	77.56	99.76	89.74	98.16	83.73	99.42	93.82	79.36	53.27	84.66	6
CASKIN1	99.87	98.36	97.8	33.45	81.8	95.06	99.86	77.18	77.41	99.44	91.04	97.48	98.81	97.52	82.51	93.79	99.27	94.71	99.23	94.81	70.93	99.64	93.31	6
FNBP1L	99.87	95.6	99.89	98.94	96.94	93.62	89.2	99.64	99.99	31.3	98.87	100	74.68	95.99	91.33	69.38	99.68	96.18	96.57	83.32	42.23	92.9	97.28	6
HHAT	93.33	99.9	99.89	98.53	87.26	17.48	92.51	99.9	99.84	35.21	98.85	99.85	99.62	96.64	84.69	77.92	61.71	92.23	97.56	90.33	89.13	95.46	96.21	6
KIAA1549	82.56	95	99.65	98.69	99.51	99.84	98.57	93.99	95.5	96.86	44.48	97.92	98.03	99.99	93.65	100	96.23	92.45	99.65	97.79	90.2	98.84	98.72	6
MAP7	98.14	97.18	95.77	96.21	98.38	38.95	99.16	88.81	99.99	72.04	97.23	97.9	99.98	75.98	99.05	87.05	99.88	31.71	39.54	95.64	93.99	99.62	97.81	6
MARVELD2	96.82	99.96	99.02	98.33	97.99	27.42	70.91	97.1	99.49	9.16	99.14	99.85	86.93	91.83	97.43	90.46	97.23	52.6	58.7	96.05	88.71	99.98	68.09	6
PCYOX1	76.75	98.77	83.88	75.85	95.8	65.89	99.8	99.66	86.63	65.5	99.19	99.24	96.81	99.48	63.31	69.2	96.46	62.97	96.41	93.84	48.04	98.16	99.62	6
PLA2G12A	99.92	99.98	98.01	95.39	91.96	65.41	98.7	99.48	93.88	79.96	85.48	99.37	66.08	28.56	84.63	95.29	99.85	93.26	98.98	81.72	97.19	99.96	53.39	6
RCOR2	92.98	40.66	99.88	20.86	99.36	98.53	99.64	63.14	66.95	94.94	27.59	71	99.73	99.97	99.74	58.63	20.81	94.67	95.97	98.63	91.21	75.74	89.51	6
RMND5A	96.51	93.88	97.88	94.27	99.41	98.14	99.65	90.26	45.16	87.35	98.31	96.63	99.22	99.88	95.57	90	97.1	97.2	98.55	99.8	87.5	99.25	98.66	6
USP22	60.81	94.73	90.52	56.07	96.62	95.33	73.34	99.83	94.94	90.7	87.13	97.69	91.01	99.37	34.22	92.14	96.34	99.03	99.73	73.22	99.92	99.42	54.09	6
USP30	98.98	99.94	91.42	99.42	45.24	96.46	67.28	97.65	64.72	95.74	99.03	87.81	56.34	99.59	43.6	99.31	95.69	98.17	89.19	91.07	95.74	99.12	91.43	6
ZNF74	99.02	54.97	88.49	91.93	92.44	98.26	99.5	41.36	45.19	95.71	92.99	99.51	99.99	95.93	62.72	71.07	99.26	94.12	99.84	65.95	47.83	69.36	89.99	6
ACVR2B	99.17	99.54	98.51	92.81	90.7	99.77	74.95	97.23	96.92	99.98	73.22	95.09	93.15	99.85	85	93.62	96.04	94.95	98.65	98.76	64.77	88.15	97.8	5
ANKRD46	99.68	92.18	89.17	96.17	88.27	65.21	94	86.18	71.11	99.77	69.68	82.3	71.46	86	54.27	95.28	80.09	96.82	89.68	99.07	85.76	99.8	99.32	5
ARID2	99.11	99.25	93.77	58.29	93.56	95.96	84	93.65	75.69	85.53	92.99	80.99	83.64	99.09	48.96	99.75	95.76	99.97	82.79	46.45	80.73	96.01	89.91	5
ATP8B1	99.81	99.88	99.59	65.54	99.81	6.04	86.73	78.17	73.2	3.69	98.6	96.74	99.48	7.04	90.4	13.68	92.7	68.71	34.73	85.61	93.21	95.72	69.22	5
ATP9A	92.28	92.21	99.31	96.9	90.78	97.52	76.56	97.49	98.42	99.26	93.18	99.64	84.64	82.5	94.46	98.05	88.86	99.14	90.97	98.47	99.84	95.75	90.53	5
BPTF	91.53	89.57	94.89	93.9	85.3	99.09	83.04	95.74	99.65	92.3	99.42	92.37	88.76	83.25	45.61	99.73	87.65	99.15	98.09	92.02	74.92	87.76	88.26	5
CACNA1D	99.99	99.83	99.29	98.93	82.34	72.45	61.37	95.14	99	88.56	94.11	98.31	52.51	99.13	65.01	97.78	97.35	92.12	81.81	99.38	90.42	94.92	90.09	5
CDH1	95.84	91.78	94.56	99.55	99.04	92.95	99.2	94.27	22.05	54.71	86.97	96.67	99.2	66.38	99.17	10.8	97.29	62.89	39.57	86.36	85.52	80.84	48.68	5
CECR2	98.11	63.87	39.62	73.09	65.05	99.58	70	76.48	61.51	99.06	96.89	99.77	96.77	97.05	22.53	99.51	99.52	58.39	97.89	53.73	41.89	77.79	58.41	5
CUL4A	53.1	87.34	85.06	94.27	99.76	83.08	93.87	98	99.06	28.21	99.15	88.14	72.53	82.88	99.53	80.51	99.21	93.59	98.08	93.44	58.56	94.08	80.83	5
DNAL1	77.4	99.95	96.43	37.43	49.79	58.68	75.04	99.51	99.88	70.43	34.12	89.23	39.39	99.03	64.21	82.81	94.11	78.23	89.39	86.3	96.23	99.96	38.16	5
EPB41L5	76.52	99.6	94.35	91.64	92.06	99.75	82.32	99.75	99.97	79.98	99.95	97.93	66.14	87.62	79.06	90.61	92.22	93.6	96.12	98.85	82.29	91.85	90.4	5
GPR56	82.63	40.16	94.25	99.91	83.73	99.47	89.49	89.06	28.43	46.23	24.84	99.19	99.14	16.34	97.73	17.83	58.04	13.37	90.2	99.47	64.88	93.36	57.72	5
HOOK1	95.22	98.85	99.98	95.8	99.61	46.82	80.04	91.71	99.9	73.6	97.33	98.45	95.87	88.29	93.65	99.37	98.15	64.41	42.39	91.45	99.07	97.86	86.07	5
ICA1	99.64	96.01	65.42	99.65	88.3	65.44	12.2	53.07	36.39	37.99	24.04	99.58	19.9	46.66	99.94	72.4	97.99	11.59	73.55	99.37	75.06	42.45	80.45	5
IFT140	99.69	97.45	98.24	92.84	66.99	94.54	79.43	79.31	97.84	72.29	80.81	99.88	72.66	96.11	99.48	95.41	57.36	93.1	94.78	91.5	99.5	99.22	57.34	5
KIAA1543	99.45	85.01	99.24	93.51	96.13	78.97	96.57	57.21	86.02	98.29	69.47	99.47	99.19	82.23	99.98	89.73	96.86	64.2	43.05	95.31	82.61	71.61	69.07	5
KIAA1737	88.69	99.75	99.98	80.25	97.91	76.45	96.83	99.17	93.31	96.47	81.85	92.33	88.75	89.31	84.24	93.55	95.14	83.1	99.27	84.11	97.89	99.68	93.22	5
KLHL23	79.19	86.25	99.49	82.78	99.78	98.39	94.58	79.87	88.23	98.91	98.66	92.62	89.13	98.85	89.46	82.55	97.91	99.17	92.42	83.25	98.98	99	99.31	5
LRBA	98.1	99.82	92.85	84.7	95.16	73.51	83.57	99.43	99.63	46.46	75.05	99.36	44.36	56.31	80.85	99.93	96.14	82.94	38.91	60.14	81.49	85.64	59.16	5
LRP5	92.82	65.11	91.18	89.27	78.21	99.03	89.92	89.08	92.35	74.73	99.23	97.68	81.11	88.28	99.78	34.74	80.35	97.18	96.85	99.23	99.9	96.46	90.61	5
MAP4K3	99.97	97.28	99.82	84.38	99.3	82.88	99.67	98.93	72.14	89.87	98.9	85.68	91.76	98.66	91.71	92.05	78.5	97.58	94.85	99.01	64.6	93.89	92.66	5
MFN1	72.11	66.77	99.15	75.42	97.13	56.29	99.89	99.8	99.61	67.03	92.14	42.38	96.13	17.91	55.59	71.54	92.88	91.44	91.31	69.12	92.23	60.36	99.15	5
MIPOL1	94.7	99.36	99.19	62.53	80.58	29.94	99.66	85.73	89.94	91.74	90.29	76.77	93.74	82.09	94.6	89.11	92.78	99.62	99.87	93.82	84.82	95.94	96.76	5
MYEF2	67.27	98.61	59.72	97.65	54.8	99.99	35	93.03	99.62	96.95	36.43	95.4	59.99	92.57	53.39	99.79	99.74	94.96	95.3	89.1	99.2	61.2	89.82	5
MYST2	73.89	95.49	88.27	91.67	99.18	99.97	83.47	95.44	95.3	90.53	99.72	96.83	85.11	80.89	61.79	99.55	85.75	95.9	87.62	82.63	20.59	99.87	87.62	5
MYST4	96.41	99.34	98.3	55.94	83.67	98.72	84.9	92.49	89.16	99.77	96.44	95.41	83.36	94.62	51.2	99.94	94.07	99.75	44.8	96.7	62.58	94.51	99.13	5
NCKAP1	70.84	88.7	92.29	87.1	99.84	96.29	99.98	99.78	87.77	89.44	96.49	80.33	99.18	57.89	91.65	93.91	84.33	97.78	99.75	97.25	67.63	82.68	98.1	5
NCOA6	88.01	88.95	95.22	92.91	98.21	99.7	90.72	94.02	98.8	80.42	99.79	83.32	98.05	94.05	96.28	99.47	93.58	98.37	89.66	99.04	75.25	91.93	99.2	5
OCLN	97.87	99.06	99.4	82.6	96.89	77.77	82.31	96.63	99.85	53.03	99.23	99.87	61.49	58.26	93.05	78.99	84.31	71.39	78.09	85.77	84.77	96.84	85.99	5
OPHN1	83.51	92.96	99.54	86.75	94.24	95.03	84.63	98.71	96.13	99.91	90.63	99.91	91.59	55.78	58.95	97.21	88.48	97.22	70.89	99.48	60.01	99.9	93.53	5
PLEKHH1	99.88	81.62	72.61	88.09	83.22	80.54	51.49	89.72	99.88	91.5	79.69	57.63	96.08	99.36	99.62	84.14	99.6	58.28	79.13	66	30.75	96.95	85.74	5
PLXNB1	99.66	86.99	77.65	98.7	71.88	94.26	32.38	84.97	92.75	88.98	81.65	98.64	99.15	68.8	99.12	82.51	45.25	92.33	94.29	99.3	99.47	60.04	55.12	5
RALGPS1	99.12	98.75	98.53	91.62	89.87	98.07	39.84	87.88	99.11	99.61	47.43	97.66	52.26	90.48	97.18	99.54	77.35	94.26	39.51	73.13	78.36	99.79	78.57	5
RAP1GAP	99.48	88.16	99.99	44.44	99.64	85.98	99.93	92.65	86.28	87.24	75.54	99.99	82	61.84	93.66	81.8	98.11	91.91	58.48	98.9	92.18	97.4	80.74	5
SALL2	96.43	99.38	95.91	24.39	43.71	97.6	86.13	86.63	91.7	97.98	59.66	99.43	83.17	99.95	28.79	97.8	82.7	99.88	91.29	85.94	99.72	97.97	98.53	5
SBK1	98.67	80.39	99.91	37.66	92.6	99.12	59.92	10.64	95.17	93.77	14.88	99.71	99.13	99.63	49.18	89.81	98.2	89.39	17.71	44.63	67.51	74.72	88.86	5
SH3RF1	81.62	99.85	99.09	57.13	84.65	84.99	92.39	97.74	99.3	75.47	66.97	99.06	31.96	66.93	97.2	69.02	97.05	65.39	89.12	49.35	98.92	99.4	91.74	5
SLC25A13	74.41	44.05	99.33	87.5	98.14	61.54	99.07	98.87	89.73	22.7	92.08	83.54	84.95	93.89	97.68	83.33	90.48	60.25	99.18	99.27	72.39	99.32	96.98	5
SMARCC1	95.94	89.53	89.89	89.56	99	94.7	62.82	97.35	91.37	79.56	94.37	94.47	82.31	99.44	87.17	50.93	99.66	99.58	98.9	70.85	92.99	72.85	99.82	5
SOCS7	63.07	90.23	94.67	46.66	99.87	98.62	99.57	99.85	97.38	89.92	97.81	95.09	97.45	99.37	65.73	93.96	88.12	95.57	99.94	97.93	39.16	97.31	90.9	5
SPATA6	97.07	99.2	99.07	68.1	86.71	83.61	90.57	95.83	99.83	25.58	40.48	98.84	49.16	94.26	83.1	70.72	37.21	90.66	94.16	87.01	68.63	99.03	99.12	5
TMTC4	97.05	87.63	99.14	97.74	99.2	55.01	96.48	94.99	94.37	50.3	95.13	99.7	96.51	73.22	94.93	37.88	99.89	82.66	99.14	94.6	81.6	50.62	95.09	5
TRIM45	98.97	95.27	99.13	74.52	84.83	72.65	94.72	72.19	92.08	43.37	93.66	96.82	99.9	97.89	91.41	83.08	34.58	99.6	99.24	99.09	95.29	42.25	97.5	5
TTC3	98.2	96.77	99.95	98.88	88.48	93.77	86.48	97.75	92.88	99.79	84.47	99.79	80.12	99.35	52.83	98.07	99.8	97.63	91.64	83.04	91.43	69.3	95.13	5
TUB	45.49	69.31	54.82	22.86	37.49	95.21	81.86	87.23	95.49	99.84	78.57	86.37	88.74	99.46	17.97	80.26	81.64	99.56	98.43	79.98	99.36	99.33	81.17	5
USP46	97.75	93.26	83.78	44.05	84.29	84.37	99.65	99.19	62.98	98.56	91.33	92.27	99.41	87.33	46.03	76.76	92.59	84.54	99.25	53.62	65.5	99.81	95.85	5
ZCCHC14	68.73	72.29	99.45	60.25	79.78	99.64	97.59	97.24	99.76	99.28	94.76	98.23	94.07	95.19	78.85	95.68	67.7	93.92	99.56	94.7	97.95	57.19	55.15	5
ZKSCAN2	91.48	99.37	89.17	63.07	92.09	99.81	44.11	99.42	96.87	92.01	71.57	98.6	79.08	99.41	16.99	93.07	69.74	98.58	99.48	48.42	98.83	97.42	32.79	5
ZMYND11	94.74	96.71	99.44	72.86	99.72	96.07	86.43	99.68	98.83	99.93	96.92	90.62	68.26	55.63	44.34	96.22	86.71	93.34	78.95	78.14	80.48	99.97	98.5	5
ZNF462	54.24	23.72	72.15	68.97	92.98	99.24	71.31	92.41	99.35	92.68	38.98	88.25	95.71	87.48	64.26	93.08	94.57	99.18	99.09	95.45	95.45	92.1	99.38	5
ZNF704	93.87	86.9	99.74	96.72	98.94	99.95	53.78	94.11	92.2	87.22	94.52	99.86	85.96	71.16	30.25	94.04	75.65	99.22	97.99	98.24	86.24	98.81	99.92	5
ZNF774	99.42	90.69	99.17	99.94	97.16	80.86	93.59	86.7	88.86	85.95	90.41	99.42	98.64	18.72	86.22	97.96	30.05	96.98	86.36	99.29	95.89	65.23	96.42	5

## Sheet: C1&C2 Signature Genes
Genes comprising the C1 and C2 CulPRIT gene signatures are listed
Gene symbols correspond to the GRCh38 human genome assembly.
MPR CulPRITs	MPR C1 or C2		EBP CulPRITs	EBP C1 or C2
ADAMTS13	C2		ACLY	C1
AKR7L	C2		AKAP1	C1
AP1M2	C2		HMGCR	C1
ARHGAP8	C2		CYP51A1	C1
BCAR1	C2		FASN	C1
C14orf93	C2		HMGCS1	C1
CDK16	C2		EXTL2	C1
DHRS11	C2		CASKIN1	C1
DVL1	C2		GTF3C2	C1
EHMT2	C2		ADNP	C1
GCAT	C2		CMTM4	C1
GGCT	C2		KCTD3	C1
GTPBP3	C2		TET3	C1
KAT2A	C2		NCKAP1	C1
KIAA0895L	C2		CAMSAP2	C1
KLC4	C2		KDM5B	C1
MFSD3	C2		RMND5A	C1
MMAB	C2		ACVR2B	C1
MTA1	C2		HOOK1	C1
MTX2	C2		FAM168B	C1
NECAB3	C2		KIAA1549	C1
NME4	C2		LRP6	C1
NOL3	C2		TTC3	C1
NR2F6	C2		SNORD116-4	C1
OBSL1	C2		LCLAT1	C1
PAK4	C2		XPO5	C1
POLD2	C2		ODR4	C1
PPFIA3	C2		ACACA	C1
PRKCZ	C2		TOM1L1	C1
PRPF40B	C2		FNBP1L	C1
RAB17	C2		AR	C1
RAB40C	C2		ARFGEF3	C1
RAC3	C2		PCYOX1	C1
RCCD1	C2		MAGI1	C1
RHBDL1	C2		RPS6KA6	C1
RTKN	C2		RASEF	C1
SHC2	C2		AKR1C2	C2
SLC19A1	C2		GPX2	C2
SLC25A1	C2		SPRR1B	C2
SLC4A3	C2		GJB6	C2
SOX12	C2		GRHL3	C2
TM7SF2	C2		LGALS7B	C2
TMEM9	C2		KRT17	C2
TOP1MT	C2		SPRR1A	C2
TRAP1	C2		DHCR7	C2
VPS37D	C2		MAGEA2	C2
WDR6	C2		MAGEA9B	C2
WDR90	C2		MAGEA6	C2
ZNF219	C2		MAGEA3	C2
ZNF768	C2		PKP1	C2
KDF1	C2		B4GALNT4	C2
FAM234A	C2		SOX11	C2
ERG28	C2		ST8SIA2	C2
CACFD1	C2
LOC202781	C2
CLBA1	C2
ATAT1	C2
ABCD3	C1
ACBD3	C1
ADNP	C1
AFF4	C1
ALDH6A1	C1
ALS2	C1
AMOTL1	C1
ANAPC1	C1
ANKRD17	C1
ANKRD26	C1
APOOL	C1
ARHGAP5	C1
ARHGEF12	C1
ARHGEF17	C1
ASAP2	C1
ASH1L	C1
ATE1	C1
ATF2	C1
ATF7	C1
ATG2B	C1
ATRN	C1
ATXN1L	C1
BDP1	C1
BIRC6	C1
BPTF	C1
BRWD3	C1
C5orf24	C1
C5orf51	C1
CCNT1	C1
CDC42BPB	C1
CDC73	C1
CEBPZ	C1
CEP97	C1
CHD6	C1
CHML	C1
CKAP5	C1
CLASP1	C1
CLCN3	C1
CSE1L	C1
CTNNB1	C1
CTNND1	C1
CUL5	C1
CXADR	C1
DAAM1	C1
DCUN1D1	C1
DDI2	C1
DDX21	C1
DENND2C	C1
DHX15	C1
DHX33	C1
DHX40	C1
DHX9	C1
DIP2B	C1
DPY19L3	C1
EIF3A	C1
EIF4G3	C1
EP300	C1
ERC1	C1
ETV3	C1
EXOC6B	C1
FAM161B	C1
FAM168A	C1
FAM172A	C1
FAT1	C1
FKTN	C1
FNBP1L	C1
FRS2	C1
G2E3	C1
GAN	C1
GFM1	C1
GFPT1	C1
GMCL1	C1
GNA11	C1
GOLGA4	C1
GON4L	C1
GPATCH8	C1
GTF2A1	C1
GTF2H3	C1
GTF2I	C1
GTF3C3	C1
GTF3C4	C1
HACE1	C1
HEATR1	C1
HEATR5B	C1
HECTD1	C1
HMGXB4	C1
INTS2	C1
IPO7	C1
IPP	C1
IREB2	C1
KBTBD7	C1
KDM5B	C1
KIDINS220	C1
KIF13A	C1
KIF1B	C1
KLHDC10	C1
KLHL11	C1
KLHL28	C1
KRBA2	C1
LAMC1	C1
LCOR	C1
LMBR1	C1
LMBRD2	C1
LMTK2	C1
LNX2	C1
LRCH3	C1
LRIG2	C1
LRP12	C1
LRP6	C1
LRRC58	C1
MAN1A2	C1
MAP4K5	C1
MAPK6	C1
MAPK8	C1
MBTPS2	C1
MDN1	C1
MED1	C1
MED13L	C1
MIB1	C1
MPDZ	C1
MPP5	C1
MTX3	C1
MYO9A	C1
N4BP2	C1
NAA25	C1
NBEAL1	C1
NCKAP1	C1
NDFIP2	C1
NDUFS1	C1
NEU3	C1
NF1	C1
NIPBL	C1
NUMA1	C1
NUP155	C1
PAFAH1B2	C1
PANK3	C1
PARD3B	C1
PCYOX1	C1
PDP2	C1
PDZD8	C1
PHF3	C1
PKN2	C1
PLEKHM3	C1
POLR2A	C1
POLR3A	C1
PPM1L	C1
PRDM10	C1
PREPL	C1
PRKAR2A	C1
PTPN11	C1
PTPN14	C1
PUM1	C1
PUM2	C1
PUS7	C1
QSER1	C1
RAB3GAP2	C1
RAD50	C1
RAD54L2	C1
RALGAPA2	C1
RALGAPB	C1
RANBP2	C1
RBBP5	C1
RBM26	C1
RBM27	C1
REV3L	C1
RGP1	C1
RGPD3	C1
ROCK2	C1
RSC1A1	C1
RSF1	C1
SAMD4B	C1
SBF2	C1
SBNO1	C1
SCAPER	C1
SCYL2	C1
SECISBP2L	C1
SERINC3	C1
SERINC5	C1
SHPRH	C1
SLC30A6	C1
SLC35F5	C1
SLK	C1
SMAD5	C1
SMARCAD1	C1
SNX13	C1
SOCS7	C1
SOS2	C1
SPAG9	C1
SRRM2	C1
STOX2	C1
STRN	C1
STXBP4	C1
SYPL1	C1
TAF1	C1
TAF1L	C1
TAF2	C1
TAOK1	C1
TBC1D8B	C1
TBCEL	C1
TEAD1	C1
TGFBRAP1	C1
TJP1	C1
TM9SF2	C1
TM9SF3	C1
TNKS	C1
TNRC6B	C1
TOP2B	C1
TOR1AIP2	C1
TRIM33	C1
TRIO	C1
TRIP11	C1
TRPM7	C1
TSTD2	C1
TTC30A	C1
TTC30B	C1
TTC37	C1
TXLNG	C1
UBE3A	C1
UBR3	C1
UBR5	C1
UBXN7	C1
UCHL5	C1
USP34	C1
UTP20	C1
WDFY3	C1
WDHD1	C1
WDR3	C1
WDR31	C1
WDR43	C1
WDR47	C1
WIPF2	C1
YAP1	C1
YIPF6	C1
YLPM1	C1
ZBTB41	C1
ZFR	C1
ZKSCAN1	C1
ZMYM2	C1
ZNF260	C1
ZNF281	C1
ZNF292	C1
ZNF354C	C1
ZNF420	C1
ZNF462	C1
ZNF507	C1
ZNF627	C1
ZNF704	C1
ZNF713	C1
ZNF770	C1
ZNF776	C1
ZNF827	C1
ZNF829	C1
ZZZ3	C1
DENND10P1	C1
RBFOX2	C1
CAMSAP2	C1
NDC1	C1
HECTD4	C1
AFDN	C1
RTL6	C1
MIGA1	C1
HACD2	C1
BROX	C1
TCAF1	C1
SLX4IP	C1
POMK	C1
CSNK2A3	C1
USF3	C1
LTN1	C1
WDPCP	C1
CPLANE1	C1
KMT2C	C1
EMSY	C1
PWAR5	C1
MRTFB	C1
ZKSCAN8	C1
LNPK	C1
MMUT	C1

## Sheet: C1&C2 Signatures in Riaz et al
C1, C2 and Tsig signature scores and quartiles computed for the Riaz et al melanoma biopsy data set (PMID: 29033130).
Sample ID	Patient No.	OS Time (weeks)	OS Event	Ipi Category	Pre or On Treatment	Response Category (PD=progressive disease, SD=stable disease, PRCR=partial or complete response)	TSIG Score	T-Sig Quartile Categories	C2 Signature Score	C2 Quartile Categories	C1 Signature Score	C1 Quartile Categories
Pt39_Pre_AD485899-5	Pt39	23.7143	1	Ipi-P	Pre	PD	0.036574	1_PRE_25	2.6018	1_PRE_50	3.44931	1_PRE_75
Pt84_Pre_AD486532-5	Pt84	21.5714	1	Ipi-Naïve	Pre	PD	0.108745	1_PRE_25	3.13005	1_PRE_75	3.23765	1_PRE_50
Pt85_Pre_AD486329-5	Pt85	129.143	0	Ipi-P	Pre	PD	0.114114	1_PRE_25	2.85359	1_PRE_50	3.43105	1_PRE_75
Pt17_Pre_E9047563-6	Pt17	8.14286	1	Ipi-P	Pre	PD	0.169595	1_PRE_25	2.66062	1_PRE_50	3.60043	1_PRE_75
Pt78_Pre_AD467018-5	Pt78	11.1429	1	Ipi-P	Pre	PD	0.326533	1_PRE_25	2.5643	1_PRE_50	2.79388	1_PRE_25
Pt72_Pre_AD793922-5	Pt72	110	1	Ipi-Naïve	Pre	PRCR	0.344142	1_PRE_25	2.83847	1_PRE_50	3.35524	1_PRE_50
Pt38_Pre_E9200719-6	Pt38	23.8571	1	Ipi-P	Pre	SD	0.455749	1_PRE_25	2.97303	1_PRE_75	3.41663	1_PRE_50
Pt10_Pre_E9047565-6	Pt10	36.5714	1	Ipi-Naïve	Pre	SD	0.67066	1_PRE_25	2.73545	1_PRE_50	3.59688	1_PRE_75
Pt36_Pre_AD467095-6	Pt36	154.429	0	Ipi-P	Pre	SD	0.808645	1_PRE_25	1.99978	1_PRE_25	3.03737	1_PRE_50
Pt66_Pre_AD667850-6	Pt66	77.4286	1	Ipi-Naïve	Pre	PD	1.15567	1_PRE_25	3.28922	1_PRE_75	3.27418	1_PRE_50
Pt98_Pre_AD733586-8	Pt98	106.714	1	Ipi-P	Pre	SD	1.15964	1_PRE_25	3.09418	1_PRE_75	3.192	1_PRE_50
Pt62_Pre_AD608303-5	Pt62	67.4286	1	Ipi-Naïve	Pre	PD	1.36143	1_PRE_25	3.28817	1_PRE_75	2.70652	1_PRE_25
Pt9_Pre_E9021024-6	Pt9	13.1429	1	Ipi-Naïve	Pre	PD	1.37846	1_PRE_50	2.7317	1_PRE_50	3.65185	1_PRE_75
Pt26_Pre_AD467789-6	Pt26	136	0	Ipi-P	Pre	SD	1.42304	1_PRE_50	2.55855	1_PRE_50	3.75948	1_PRE_75
Pt89_Pre_AE070951-5	Pt89	120.571	1	Ipi-Naïve	Pre	SD	1.49894	1_PRE_50	2.94757	1_PRE_75	3.2228	1_PRE_50
Pt30_Pre_AD497503-5	Pt30	150.429	0	Ipi-Naïve	Pre	PRCR	1.54304	1_PRE_50	2.75095	1_PRE_50	3.50019	1_PRE_75
Pt27_Pre_AD453873-5	Pt27	67.8571	1	Ipi-Naïve	Pre	PD	1.77018	1_PRE_50	2.52443	1_PRE_50	3.04292	1_PRE_50
Pt37_Pre_AD502452-5	Pt37	92.2857	1	Ipi-P	Pre	SD	1.78381	1_PRE_50	3.1774	1_PRE_75	2.85341	1_PRE_25
Pt52_Pre_AD506075-6	Pt52	68	1	Ipi-P	Pre	PD	1.87331	1_PRE_50	2.60934	1_PRE_50	3.27491	1_PRE_50
Pt29_Pre_AD497504-5	Pt29	39	1	Ipi-Naïve	Pre	PD	1.96036	1_PRE_50	2.69666	1_PRE_50	3.43759	1_PRE_75
Pt47_Pre_AD506073-6	Pt47	102.571	1	Ipi-P	Pre	PD	2.01694	1_PRE_50	2.47465	1_PRE_25	3.42456	1_PRE_75
Pt79_Pre_AD733587-5	Pt79	31.1429	1	Ipi-P	Pre	SD	2.01798	1_PRE_50	2.85398	1_PRE_75	3.43682	1_PRE_75
Pt48_Pre_E9047561-7	Pt48	149.429	0	Ipi-P	Pre	PRCR	2.14494	1_PRE_50	2.11142	1_PRE_25	2.76066	1_PRE_25
Pt28_Pre_AD297619-6	Pt28	105.714	1	Ipi-Naïve	Pre	PD	2.36125	1_PRE_50	2.56076	1_PRE_50	3.49519	1_PRE_75
Pt67_Pre_AD506074-6	Pt67	147.429	0	Ipi-P	Pre	SD	2.66855	1_PRE_50	2.74586	1_PRE_50	2.86897	1_PRE_25
Pt4_Pre_E9021023-6	Pt4	90.4286	1	Ipi-Naïve	Pre	SD	2.67199	1_PRE_50	3.14215	1_PRE_75	3.31459	1_PRE_50
Pt8_Pre_AD153354-6	Pt8	37	1	Ipi-Naïve	Pre	PD	2.73746	1_PRE_50	2.67702	1_PRE_50	3.23498	1_PRE_50
Pt82_Pre_AD823914-8	Pt82	61.2857	1	Ipi-P	Pre	SD	2.82825	1_PRE_50	2.77766	1_PRE_50	3.31368	1_PRE_50
Pt94_Pre_AD732850-6	Pt94	140.143	0	Ipi-Naïve	Pre	PRCR	2.89767	1_PRE_50	2.77959	1_PRE_50	3.00927	1_PRE_25
Pt106_Pre_AD502250-5	Pt106	13	1	Ipi-P	Pre	PD	2.96191	1_PRE_50	3.03581	1_PRE_75	3.2268	1_PRE_50
Pt24_Pre_AD436687-5	Pt24	21.2857	0	Ipi-Naïve	Pre	PD	3.04524	1_PRE_50	1.63591	1_PRE_25	2.66993	1_PRE_25
Pt46_Pre_AD467096-6	Pt46	32.4286	1	Ipi-P	Pre	PD	3.10546	1_PRE_50	1.86093	1_PRE_25	2.44806	1_PRE_25
Pt31_Pre_AD453872-5	Pt31	137.286	0	Ipi-Naïve	Pre	PD	3.19222	1_PRE_50	2.51829	1_PRE_50	3.38062	1_PRE_50
Pt65_Pre_AD793919-6	Pt65	98.8571	0	Ipi-P	Pre	SD	3.23468	1_PRE_50	2.70111	1_PRE_50	3.28329	1_PRE_50
Pt90_Pre_AD467873-6	Pt90	24.8571	1	Ipi-P	Pre	PD	3.42686	1_PRE_50	2.61985	1_PRE_50	2.81222	1_PRE_25
Pt2_Pre_AD101150-6	Pt2	39.2857	1	Ipi-P	Pre	SD	3.46581	1_PRE_50	2.63705	1_PRE_50	3.27114	1_PRE_50
Pt11_Pre_AD153352-6	Pt11	119.571	1	Ipi-Naïve	Pre	PD	3.49222	1_PRE_75	2.42423	1_PRE_25	3.40886	1_PRE_50
Pt44_Pre_AD467790-6	Pt44	156.143	0	Ipi-Naïve	Pre	PRCR	3.62308	1_PRE_75	2.34673	1_PRE_25	3.51321	1_PRE_75
Pt1_Pre_AD101148-6	Pt1	22.8571	1	Ipi-P	Pre	PD	3.83468	1_PRE_75	2.64308	1_PRE_50	3.25365	1_PRE_50
Pt59_Pre_AD823915-5	Pt59	101.143	1	Ipi-Naïve	Pre	SD	3.84691	1_PRE_75	2.81737	1_PRE_50	3.10601	1_PRE_50
Pt5_Pre_E9021022-6	Pt5	31.7143	1	Ipi-Naïve	Pre	PD	3.86362	1_PRE_75	3.22296	1_PRE_75	3.0622	1_PRE_50
Pt92_Pre_AE134060-5	Pt92	47.5714	1	Ipi-P	Pre	SD	4.29338	1_PRE_75	3.03479	1_PRE_75	3.06248	1_PRE_50
Pt103_Pre_AE134058-2	Pt103	69.1429	0	Ipi-P	Pre	PD	4.33506	1_PRE_75	2.61495	1_PRE_50	1.5856	1_PRE_25
Pt18_Pre_E9024732-6	Pt18	153.286	0	Ipi-Naïve	Pre	PRCR	4.4388	1_PRE_75	2.43696	1_PRE_25	3.31723	1_PRE_50
Pt49_Pre_AD667851-6	Pt49	118.143	0	Ipi-P	Pre	PRCR	4.46109	1_PRE_75	2.4887	1_PRE_25	3.09403	1_PRE_50
Pt34_Pre_AD466985-6	Pt34	119.143	0	Ipi-P	Pre	PRCR	4.65539	1_PRE_75	1.89278	1_PRE_25	2.63675	1_PRE_25
Pt77_Pre_AD733591-7	Pt77	67.2857	1	Ipi-Naïve	Pre	SD	5.00945	1_PRE_75	2.49789	1_PRE_25	3.23496	1_PRE_50
Pt101_Pre_AD486328-5	Pt101	119.143	0	Ipi-P	Pre	PRCR	6.0427	1_PRE_75	2.17201	1_PRE_25	2.9337	1_PRE_25
Pt84_On_AD495199-6	Pt84	21.5714	1	Ipi-Naïve	On	PD	0.0934044	2_ON_25	2.9922	2_ON_75	3.17449	2_ON_50
Pt17_On_E9261162-5	Pt17	8.14286	1	Ipi-P	On	PD	0.187374	2_ON_25	2.85189	2_ON_75	3.51952	2_ON_75
Pt38_On_E9414881-5	Pt38	23.8571	1	Ipi-P	On	SD	0.561996	2_ON_25	3.0165	2_ON_75	3.4699	2_ON_75
Pt26_On_AD467915-5	Pt26	136	0	Ipi-P	On	SD	0.768457	2_ON_25	2.64213	2_ON_50	3.75709	2_ON_75
Pt32_On_E9414883-5	Pt32	16.2857	0	Ipi-P	On	PD	0.806239	2_ON_25	0.633291	2_ON_25	1.66895	2_ON_25
Pt68_On_AD635729-6	Pt68	120.286	0	Ipi-P	On	PRCR	0.938436	2_ON_25	2.73704	2_ON_50	3.37636	2_ON_50
Pt85_On_AE070989-10	Pt85	129.143	0	Ipi-P	On	PD	0.965323	2_ON_25	3.07279	2_ON_75	3.41449	2_ON_75
Pt93_On_AE070988-5	Pt93	121.286	0	Ipi-P	On	PD	0.993095	2_ON_25	3.1181	2_ON_75	3.37397	2_ON_50
Pt62_On_AD635728-5	Pt62	67.4286	1	Ipi-Naïve	On	PD	1.00422	2_ON_25	2.81499	2_ON_50	3.3674	2_ON_50
Pt9_On_E9047644-7	Pt9	13.1429	1	Ipi-Naïve	On	PD	1.29168	2_ON_25	2.97178	2_ON_75	3.59473	2_ON_75
Pt48_On_E9047631-6	Pt48	149.429	0	Ipi-P	On	PRCR	1.38605	2_ON_25	2.43885	2_ON_50	2.5239	2_ON_25
Pt103_On_AE134059-6	Pt103	69.1429	0	Ipi-P	On	PD	1.44004	2_ON_25	3.0568	2_ON_75	3.16642	2_ON_50
Pt10_On_E9047632-6	Pt10	36.5714	1	Ipi-Naïve	On	SD	1.57934	2_ON_50	2.55563	2_ON_50	3.55613	2_ON_75
Pt52_On_AD530365-6	Pt52	68	1	Ipi-P	On	PD	1.79112	2_ON_50	2.91558	2_ON_75	3.40745	2_ON_50
Pt47_On_AD530367-6	Pt47	102.571	1	Ipi-P	On	PD	2.04981	2_ON_50	2.62774	2_ON_50	3.41837	2_ON_75
Pt27_On_AD467934-5	Pt27	67.8571	1	Ipi-Naïve	On	PD	2.19277	2_ON_50	2.7533	2_ON_50	3.03663	2_ON_50
Pt78_On_AE148748-6	Pt78	11.1429	1	Ipi-P	On	PD	2.24116	2_ON_50	2.37303	2_ON_25	3.04595	2_ON_50
Pt1_On_AD174047-6	Pt1	22.8571	1	Ipi-P	On	PD	2.29005	2_ON_50	2.90175	2_ON_75	3.47743	2_ON_75
Pt108_On_AE373243-6	Pt108	130.429	0	Ipi-P	On	SD	2.40066	2_ON_50	2.6266	2_ON_50	2.73373	2_ON_25
Pt79_On_AD733628-6	Pt79	31.1429	1	Ipi-P	On	SD	2.48509	2_ON_50	2.85994	2_ON_75	3.62404	2_ON_75
Pt89_On_AE070987-5	Pt89	120.571	1	Ipi-Naïve	On	SD	2.52901	2_ON_50	2.71196	2_ON_50	3.05059	2_ON_50
Pt67_On_AD530366-6	Pt67	147.429	0	Ipi-P	On	SD	2.55943	2_ON_50	2.45411	2_ON_50	2.8244	2_ON_25
Pt94_On_AE373242-6	Pt94	140.143	0	Ipi-Naïve	On	PRCR	2.56679	2_ON_50	2.78282	2_ON_50	2.75946	2_ON_25
Pt8_On_AD167380-7	Pt8	37	1	Ipi-Naïve	On	PD	2.68518	2_ON_50	2.82813	2_ON_50	2.92248	2_ON_50
Pt37_On_AD495183-5	Pt37	92.2857	1	Ipi-P	On	SD	2.72904	2_ON_50	2.37577	2_ON_50	2.38698	2_ON_25
Pt106_On_AD513626-6	Pt106	13	1	Ipi-P	On	PD	2.73114	2_ON_50	3.14803	2_ON_75	2.91089	2_ON_50
Pt5_On_E9047635-6	Pt5	31.7143	1	Ipi-Naïve	On	PD	2.94813	2_ON_50	2.79679	2_ON_50	3.42981	2_ON_75
Pt46_On_AD781834-6	Pt46	32.4286	1	Ipi-P	On	PD	3.01175	2_ON_50	1.67461	2_ON_25	2.38228	2_ON_25
Pt2_On_AD174046-6	Pt2	39.2857	1	Ipi-P	On	SD	3.15132	2_ON_50	2.62265	2_ON_50	3.36192	2_ON_50
Pt36_On_AD495182-6	Pt36	154.429	0	Ipi-P	On	SD	3.21892	2_ON_50	2.93342	2_ON_75	2.70508	2_ON_25
Pt98_On_AE086717-6	Pt98	106.714	1	Ipi-P	On	SD	3.32152	2_ON_50	2.75874	2_ON_50	3.25443	2_ON_50
Pt65_On_AD796996-5	Pt65	98.8571	0	Ipi-P	On	SD	3.49989	2_ON_50	2.53216	2_ON_50	3.32722	2_ON_50
Pt11_On_AD314068-6	Pt11	119.571	1	Ipi-Naïve	On	PD	3.65929	2_ON_50	2.44357	2_ON_50	3.31099	2_ON_50
Pt82_On_AD125218-6	Pt82	61.2857	1	Ipi-P	On	SD	3.87199	2_ON_50	2.80075	2_ON_50	3.10828	2_ON_50
Pt44_On_AD167376-6	Pt44	156.143	0	Ipi-Naïve	On	PRCR	3.91085	2_ON_50	1.85251	2_ON_25	2.92865	2_ON_50
Pt58_On_AE045812-10	Pt58	71.2857	1	Ipi-P	On	SD	4.15824	2_ON_50	2.3847	2_ON_50	3.4604	2_ON_75
Pt31_On_AD467932-6	Pt31	137.286	0	Ipi-Naïve	On	PD	4.24031	2_ON_75	2.30729	2_ON_25	3.34322	2_ON_50
Pt13_On_AD314067-6	Pt13	40	1	Ipi-Naïve	On	PD	4.55172	2_ON_75	2.37946	2_ON_50	3.44329	2_ON_75
Pt28_On_AD167375-7	Pt28	105.714	1	Ipi-Naïve	On	PD	4.78585	2_ON_75	2.71836	2_ON_50	3.35031	2_ON_50
Pt34_On_AD485757-6	Pt34	119.143	0	Ipi-P	On	PRCR	4.89392	2_ON_75	1.82635	2_ON_25	2.46135	2_ON_25
Pt30_On_AD505620-6	Pt30	150.429	0	Ipi-Naïve	On	PRCR	5.72996	2_ON_75	1.8112	2_ON_25	2.83432	2_ON_25
Pt77_On_AD733629-8	Pt77	67.2857	1	Ipi-Naïve	On	SD	5.77234	2_ON_75	2.2795	2_ON_25	3.19506	2_ON_50
Pt4_On_E9047643-7	Pt4	90.4286	1	Ipi-Naïve	On	SD	5.7819	2_ON_75	2.39643	2_ON_50	3.28111	2_ON_50
Pt87_On_AD495198-6	Pt87	139.143	0	Ipi-Naïve	On	SD	5.88857	2_ON_75	1.88906	2_ON_25	3.01544	2_ON_50
Pt101_On_AD681975-5	Pt101	119.143	0	Ipi-P	On	PRCR	5.97488	2_ON_75	2.13587	2_ON_25	3.13808	2_ON_50
Pt49_On_AD681976-5	Pt49	118.143	0	Ipi-P	On	PRCR	5.99218	2_ON_75	2.32723	2_ON_25	2.88535	2_ON_25
Pt18_On_E9261163-5	Pt18	153.286	0	Ipi-Naïve	On	PRCR	6.07009	2_ON_75	2.0353	2_ON_25	3.21178	2_ON_50
Pt92_On_AE148750-5	Pt92	47.5714	1	Ipi-P	On	SD	6.54335	2_ON_75	2.53068	2_ON_50	2.79799	2_ON_25
